# Supplementary material for: SEQUENCE SLIDER: integration of structural and genetic data to characterize isoforms from natural sources
Source: PubMed Central journal article supplement — Nucleic Acids Res. 2022 Feb 1;50(9):e50. doi: 10.1093/nar/gkac029 (PMC9122596; doi:10.1093/nar/gkac029), 2022-02-01
Supplement: gkac029_supplemental_file.pdf [file gkac029_supplemental_file.pdf]

SUPPLEMENTARY DATA

PrimaryScore from PatternLab and -10lgP from PEAKS are metrics to compare experimental and theoretical spectrum.

Supplementary Table 1: Residues of lysozyme resolved by crystallography and MS and/or phylogenetic analysis

| Res# | ResType | Crystallography |               |       | MS           | ConSurf |      |
|------|---------|-----------------|---------------|-------|--------------|---------|------|
|      |         | RSCC            | $\Delta$ Cont | RSCC* | PrimaryScore | n       | %    |
| 1    | K       | 92.2            | 9.3           | 94    |              | 173     | 95.6 |
| 3    | F       | 94              | 4             | 92.2  |              | 93      | 36.2 |
| 4    | G       | 90.9            | 24.3          | 94.7  |              | 37      | 13.7 |
| 5    | R       | 92.9            | 3.3           | 91.5  |              | 211     | 76.7 |
| 6    | C       | 94.5            | 21.7          | 95.2  | 1.73         | 275     | 98.9 |
| 9    | A       | 90.3            | 5.7           | 93.4  | 1.73         | 242     | 86.7 |
| 10   | A       | 92.3            | 12.4          | 92.6  | 1.73         | 5       | 1.8  |
| 11   | A       | 85.2            | 3.2           | 93    | 1.73         | 24      | 8.6  |
| 12   | M       | 95.9            | 3.3           | 92    | 1.73         | 22      | 7.9  |
| 13   | K       | 89.2            | 5.8           | 88.4  | 1.73         | 87      | 31.3 |
| 14   | R       | 89.3            | 4.2           | 88.8  | 1.12         | 74      | 26.4 |
| 16   | G       | 77.6            | 20.1          | 91.9  | 2.02         | 190     | 69.6 |
| 20   | Y       | 93.7            | 7.7           | 94.3  | 2.02         | 91      | 55.8 |
| 22   | G       | 83              | 11.5          | 91.2  | 2.71         | 152     | 54.1 |
| 23   | Y       | 95.3            | 7             | 94.2  | 2.71         | 79      | 27.9 |
| 24   | S       | 92.8            | 7.4           | 94    | 2.71         | 133     | 46.8 |
| 26   | G       | 94              | 9.7           | 93.7  | 2.71         | 37      | 12.9 |
| 28   | W       | 95.1            | 7.2           | 93    | 2.71         | 273     | 94.8 |
| 30   | C       | 97.1            | 12            | 94.1  | 2.71         | 295     | 99.7 |
| 31   | A       | 90.1            | 11.2          | 94.3  | 2.71         | 1       | 0.3  |
| 32   | A       | 93              | 9.1           | 95.4  | 2.71         | 201     | 67.9 |
| 33   | K       | 91.2            | 7.4           | 95.1  | 2.71         | 43      | 14.5 |
| 38   | F       | 95              | 5.4           | 94.3  | 2.44         | 142     | 48.0 |
| 42   | A       | 94.5            | 8.4           | 96.8  | 2.44         | 206     | 69.4 |
| 43   | T       | 95.1            | 5.2           | 95.5  | 2.44         | 52      | 17.5 |
| 45   | R       | 92.4            | 4.9           | 93.9  | 2.65         | 53      | 18.0 |
| 49   | G       | 80.2            | 29            | 90.5  | 3.27         | 213     | 72.2 |
| 50   | S       | 94.4            | 8.1           | 94.1  | 3.27         | 252     | 85.1 |
| 53   | Y       | 95.5            | 5.5           | 93.4  | 3.27         | 198     | 66.7 |
| 54   | G       | 92              | 15.6          | 94.9  | 3.27         | 294     | 98.7 |
| 58   | I       | 85.5            | 3.7           | 91.6  | 3.27         | 279     | 93.6 |
| 60   | S       | 94.1            | 5.7           | 92.9  | 3.27         | 162     | 54.5 |
| 62   | W       | 92              | 6.4           | 90.3  | 1.35         | 48      | 16.3 |
| 63   | W       | 93              | 8.7           | 93.3  | 1.35         | 292     | 99.0 |
| 64   | C       | 97.2            | 12.7          | 92.6  | 1.35         | 297     | 99.7 |
| 67   | G       | 83              | 14.1          | 94.4  | 1.35         | 130     | 44.5 |
| 68   | R       | 94.1            | 9.4           | 90.9  | 1.35         | 39      | 13.3 |
| 71   | G       | 67.3            | 16.2          | 85.8  | 2.15         | 27      | 19.3 |
| 72   | S       | 79.9            | 3.3           | 79    | 2.15         | 87      | 31.0 |
| 73   | R       | 76.3            | <b>2</b>      | 67.8  | 2.15         | 13      | 4.6  |
| 76   | C       | 95.4            | 13.4          | 91.8  | 3.85         | 296     | 99.3 |
| 79   | P       | 91.4            | 12.9          | 91.9  | 3.85         | 45      | 15.1 |

|     |   |      |      |      |      |     |      |
|-----|---|------|------|------|------|-----|------|
| 80  | C | 96.9 | 13.8 | 94.3 | 3.85 | 296 | 99.3 |
| 82  | A | 90.5 | 12.2 | 94.3 | 3.85 | 64  | 22.1 |
| 84  | L | 91.3 | 5.3  | 94.1 | 3.85 | 199 | 70.6 |
| 89  | T | 90   | 4.2  | 93.5 | 3.85 | 100 | 36.0 |
| 90  | A | 87.1 | 13.7 | 95.9 | 3.85 | 24  | 8.6  |
| 94  | C | 96.3 | 16.5 | 91.4 | 3.85 | 278 | 99.6 |
| 95  | A | 90.4 | 10.1 | 94.7 | 3.85 | 216 | 77.7 |
| 96  | K | 91.7 | 5    | 93.5 | 3.85 | 196 | 70.5 |
| 98  | I | 94.2 | 7.5  | 94.8 | 3.39 | 201 | 72.3 |
| 100 | S | 91.1 | 7.8  | 90.3 | 3.39 | 42  | 15.2 |
| 102 | G | 78.2 | 18.9 | 89.8 | 3.39 | 1   | 0.4  |
| 104 | G | 85.4 | 9.2  | 94.1 | 3.39 | 259 | 93.8 |
| 105 | M | 95.8 | 3.3  | 94.6 | 3.39 | 70  | 25.4 |
| 107 | A | 89.2 | 16.1 | 91.8 | 3.39 | 199 | 72.1 |
| 108 | W | 94.7 | 12.6 | 91.7 | 3.39 | 273 | 99.3 |
| 110 | A | 93.8 | 11.7 | 93.8 | 3.39 | 95  | 35.1 |
| 111 | W | 95.9 | 12.7 | 91.9 | 3.39 | 205 | 74.5 |
| 114 | R | 91.4 | 4.6  | 90.2 | 1.07 | 22  | 8.1  |
| 115 | C | 95.9 | 10.6 | 91.3 | 1.07 | 265 | 98.9 |
| 116 | K | 94.5 | 11   | 95.2 | 1.07 | 62  | 23.4 |
| 118 | T | 95.5 | 5.1  | 93.8 | 1.67 | 12  | 5.3  |
| 120 | V | 94.6 | 3.6  | 93.3 | 1.67 | 18  | 11.4 |
| 122 | A | 86.4 | 8.2  | 89.4 | 1.67 | 5   | 3.0  |
| 123 | W | 93.4 | 13.8 | 91.2 | 1.67 | 79  | 47.3 |
| 126 | G | 78.7 | 26.1 | 88.4 | 1.67 | 130 | 81.2 |
| 127 | C | 94   | 12.7 | 92.5 | 1.20 | 159 | 99.4 |

Res# stands for residue number; ResType for residues type; RSCC for real-space correlation coefficient;  $\Delta$ Cont for minimum difference within other RSCC; \* for main chain atoms; MS for mass spectrometry. RSCC in bold denotes cysteine partially occupied having  $\Delta$ Cont less than 3.0.

Supplementary Table 2: Residues of lysozyme having assignment ambiguity from crystallographic data being resolved by mass spectrometry

| Res# | ResType | Crystallography |               |             | MS<br>PrimaryScore | ConSurf |      |
|------|---------|-----------------|---------------|-------------|--------------------|---------|------|
|      |         | RSCC            | $\Delta$ Cont | Observation |                    | n       | %    |
| 7    | E!      | 93.5            | 0.6           |             | 1.73               | 167     | 59.9 |
| 7    | Q       | 93              | 5.8           |             |                    | 12      | 4.3  |
| 7    | MainCh  | 94.6            |               |             |                    |         |      |
| 8    | L!      | 92.5            | 1             | Hydrophobic | 1.73               | 215     | 77.1 |
| 8    | N       | 91.5            | 0.5           |             |                    | 0       | 0.0  |
| 8    | D       | 91              | 7.5           |             |                    | 0       | 0.0  |
| 8    | MainCh  | 93.7            |               |             |                    |         |      |
| 15   | H!      | 93.5            | 2.1           |             | 2.02               | 60      | 22.1 |
| 15   | F       | 91.4            | 0.5           |             |                    | 20      | 7.4  |
| 15   | K       | 90.9            | 2.1           |             |                    | 6       | 2.2  |
| 15   | MainCh  | 93.4            |               |             |                    |         |      |
| 17   | D       | 91.3            | 0.2           |             |                    | 0       | 0.0  |

|    |        |      |      |             |      |     |      |
|----|--------|------|------|-------------|------|-----|------|
| 17 | N      | 91.1 | 2    |             |      | 0   | 0.0  |
| 17 | L!     | 89.1 | 8.1  | Hydrophobic | 2.02 | 110 | 39.3 |
| 17 | MainCh | 88.4 |      |             |      |     |      |
| 18 | N      | 91.3 | 0.7  | 2 H-bonds   |      | 12  | 7.1  |
| 18 | D!     | 90.6 | 1    |             | 2.02 | 120 | 71.4 |
| 18 | L      | 89.6 | 7.6  |             |      | 0   | 0.0  |
| 18 | MainCh | 93.5 |      |             |      |     |      |
| 25 | L!     | 91.5 | 1.9  | Hydrophobic | 2.71 | 198 | 69.2 |
| 25 | N      | 89.6 | 0.6  |             |      | 0   | 0.0  |
| 25 | D      | 89   | 7.1  |             |      | 0   | 0.0  |
| 25 | MainCh | 92.3 |      |             |      |     |      |
| 29 | V!     | 95.5 | 1.1  | Hydrophobic | 2.78 | 160 | 54.1 |
| 29 | T      | 94.5 | 4.1  |             |      | 18  | 6.1  |
| 29 | MainCh | 91.4 |      |             |      |     |      |
| 34 | F!     | 95.7 | 2.3  |             | 2.44 | 39  | 13.2 |
| 34 | H      | 93.5 | 3.6  |             |      | 97  | 32.8 |
| 34 | MainCh | 94.8 |      |             |      |     |      |
| 35 | E!     | 94.2 | 1.2  |             | 2.44 | 248 | 83.8 |
| 35 | Q      | 93   | 4.2  |             |      | 3   | 1.0  |
| 35 | MainCh | 94.7 |      |             |      |     |      |
| 36 | S!     | 92.7 | 1.2  |             | 2.44 | 290 | 98.0 |
| 36 | C      | 91.5 | 10.1 |             |      | 0   | 0.0  |
| 36 | MainCh | 93.5 |      |             |      |     |      |
| 39 | N!     | 94.5 | 1.5  | 4 H-bonds   | 2.44 | 208 | 70.3 |
| 39 | D      | 93   | 1.2  |             |      | 48  | 16.2 |
| 39 | L      | 91.8 | 7.1  |             |      | 0   | 0.0  |
| 39 | MainCh | 94.5 |      |             |      |     |      |
| 40 | T!     | 91.1 | 0.7  | 3 H-bonds   | 2.44 | 249 | 84.1 |
| 40 | V      | 90.4 | 3.6  |             |      | 2   | 0.7  |
| 40 | MainCh | 95.1 |      |             |      |     |      |
| 44 | N!     | 92.9 | 2.8  | 4 H-bonds   | 2.44 | 106 | 35.9 |
| 44 | L      | 90.1 | 0.1  |             |      | 0   | 0.0  |
| 44 | D      | 90   | 6.8  |             |      | 20  | 6.8  |
| 44 | MainCh | 96   |      |             |      |     |      |
| 47 | V      | 86.2 | 4.6  | 3 H-bonds   |      | 10  | 3.6  |
| 47 | T!     | 81.7 | 1.2  |             | 3.27 | 31  | 11.0 |
| 47 | MainCh | 85.9 |      |             |      |     |      |
| 51 | T!     | 95.5 | 1.5  | 2 H-bonds   | 3.27 | 118 | 39.9 |
| 51 | V      | 94   | 5.4  |             |      | 8   | 2.7  |

|    |        |      |     |             |      |     |      |
|----|--------|------|-----|-------------|------|-----|------|
| 51 | MainCh | 94.3 |     |             |      |     |      |
| 55 | V      | 90.4 | 1.3 | Hydrophobic |      | 2   | 0.7  |
| 55 | T      | 89.1 | 4.8 |             |      | 0   | 0.0  |
| 55 | S      | 84.3 | 0   |             |      | 0   | 0.0  |
| 55 | I!     | 84.3 | 4.5 |             | 3.28 | 179 | 60.1 |
| 55 | MainCh | 93.2 |     |             |      |     |      |
| 56 | N      | 91   | 0.8 | Hydrophobic |      | 0   | 0.0  |
| 56 | D      | 90.2 | 2.3 |             |      | 0   | 0.0  |
| 56 | L!     | 88   | 4.3 |             | 3.28 | 10  | 3.4  |
| 56 | MainCh | 91.6 |     |             |      |     |      |
| 61 | S      | 84.6 | 1.6 |             |      | 6   | 2.0  |
| 61 | R!     | 83   | 2.8 |             | 3.28 | 111 | 37.2 |
| 61 | MainCh | 87.7 |     |             |      |     |      |
| 65 | D      | 95.1 | 0.8 | 2 H-bonds   |      | 41  | 13.8 |
| 65 | N!     | 94.3 | 1.9 |             | 1.35 | 75  | 25.3 |
| 65 | L      | 92.5 | 2.8 |             |      | 0   | 0.0  |
| 65 | MainCh | 94.8 |     |             |      |     |      |
| 69 | S      | 93.2 | 0.2 | 4 H-bonds   |      | 27  | 13.9 |
| 69 | T!     | 93   | 2   |             | 2.15 | 66  | 34.0 |
| 69 | C      | 91   | 7.2 |             |      | 0   | 0.0  |
| 69 | MainCh | 93.8 |     |             |      |     |      |
| 74 | D      | 93.9 | 2.9 | 3 H-bonds   | 2.69 | 11  | 3.7  |
| 74 | N!     | 90.9 | 0.8 |             | 3.85 | 202 | 67.8 |
| 74 | MainCh | 74.5 |     |             |      |     |      |
| 75 | L!     | 92.1 | 0.5 | Exposed     | 3.85 | 40  | 13.4 |
| 75 | S      | 91.6 | 3.8 |             | 2.15 | 2   | 0.7  |
| 75 | MainCh | 90.6 |     |             |      |     |      |
| 77 | A      | 82.5 | 3   |             | 2.15 | 1   | 0.3  |
| 77 | V      | 79.5 | 0.4 |             |      | 1   | 0.3  |
| 77 | S      | 79.1 | 1.1 |             | 2.00 | 8   | 2.7  |
| 77 | I      | 78   | 1   |             |      | 0   | 0.0  |
| 77 | L      | 76.9 | 1.1 |             |      | 0   | 0.0  |
| 77 | N!     | 75.8 | 0.3 |             | 3.85 | 75  | 25.2 |
| 77 | MainCh | 93.3 |     |             |      |     |      |
| 78 | T      | 90.3 | 1.2 | Hydrophobic |      | 12  | 4.0  |
| 78 | V      | 89.1 | 0.2 |             | 2.00 | 82  | 27.5 |
| 78 | I!     | 88.9 | 6.4 |             | 3.85 | 116 | 38.9 |
| 78 | MainCh | 91.5 |     |             |      |     |      |
| 81 | S!     | 91.3 | 2.5 |             | 3.85 | 117 | 39.3 |
| 81 | T      | 88.8 | 2.7 |             | 2.15 | 15  | 5.0  |

|     |        |      |     |             |      |     |      |
|-----|--------|------|-----|-------------|------|-----|------|
| 81  | MainCh | 92.8 |     |             |      |     |      |
| 83  | L!     | 90.5 | 2.8 | Hydrophobic | 3.85 | 222 | 77.9 |
| 83  | N      | 87.7 | 1.3 |             |      | 0   | 0.0  |
| 83  | D      | 86.4 | 5.5 |             |      | 0   | 0.0  |
| 83  | MainCh | 93.5 |     |             |      |     |      |
| 88  | !!     | 92.2 | 2.6 |             | 3.85 | 181 | 65.1 |
| 88  | V      | 89.6 | 0.8 |             |      | 11  | 4.0  |
| 88  | MainCh | 95.5 |     |             |      |     |      |
| 91  | S!     | 87.6 | 1.3 | 2 H-bonds   | 3.85 | 41  | 14.7 |
| 91  | T      | 86.3 | 2.7 |             | 1.87 | 27  | 9.7  |
| 91  | MainCh | 91.8 |     |             |      |     |      |
| 92  | I      | 87.9 | 0.4 |             |      | 126 | 45.2 |
| 92  | T      | 87.5 | 0.1 |             |      | 4   | 1.4  |
| 92  | V!     | 87.4 | 7.3 |             | 3.85 | 112 | 40.1 |
| 92  | MainCh | 92.3 |     |             |      |     |      |
| 99  | V!     | 92.3 | 0.6 | Hydrophobic | 3.39 | 118 | 42.6 |
| 99  | T      | 91.7 | 5.2 |             |      | 3   | 1.1  |
| 99  | MainCh | 95.4 |     |             |      |     |      |
| 106 | D      | 93.9 | 0.5 | 3 H-bonds   | 1.97 | 21  | 7.6  |
| 106 | N!     | 93.4 | 1.5 |             | 3.39 | 56  | 20.3 |
| 106 | L      | 91.9 | 0.8 |             |      | 1   | 0.4  |
| 106 | E      | 91.1 | 9.1 |             |      | 7   | 2.5  |
| 106 | MainCh | 93.5 |     |             |      |     |      |
| 109 | T      | 85.8 | 0.8 | Exposed     | 1.15 | 36  | 13.3 |
| 109 | V!     | 85   | 0.9 |             | 3.39 | 73  | 26.9 |
| 109 | S      | 84.1 | 3.6 |             |      | 19  | 7.0  |
| 109 | MainCh | 92.2 |     |             |      |     |      |
| 112 | R!     | 86.9 | 0.9 |             | 3.39 | 68  | 25.5 |
| 112 | K      | 86.1 | 1   |             |      | 82  | 30.7 |
| 112 | S      | 85   | 2.4 |             |      | 14  | 5.2  |
| 112 | MainCh | 91.7 |     |             |      |     |      |
| 117 | G!     | 64.2 | 0.3 |             | 1.67 | 139 | 54.5 |
| 117 | K      | 63.9 | 8.6 |             |      | 3   | 1.2  |
| 117 | MainCh | 89.6 |     |             |      |     |      |
| 124 | T      | 92.6 | 2.1 | Exposed     |      | 18  | 11.0 |
| 124 | V      | 90.5 | 2.1 |             | 1.34 | 56  | 34.4 |
| 124 | !!     | 88.4 | 4.7 |             | 1.67 | 32  | 19.6 |
| 124 | MainCh | 93.7 |     |             |      |     |      |
| 125 | A      | 83.4 | 4.3 |             |      | 20  | 12.5 |

|     |        |      |     |             |      |    |      |
|-----|--------|------|-----|-------------|------|----|------|
| 125 | G      | 79.2 | 2.2 |             | 0.82 | 1  | 0.6  |
| 125 | S      | 76.9 | 4.8 |             | 0.90 | 9  | 5.6  |
| 125 | K      | 72.2 | 1.7 |             | 1.34 | 27 | 16.9 |
| 125 | R!     | 70.5 | 0.5 |             | 1.67 | 25 | 15.6 |
| 125 | MainCh | 91.4 |     |             |      |    |      |
| 129 | N      | 81.1 | 0.4 | Hydrophobic |      | 0  | 0.0  |
| 129 | D      | 80.7 | 0.4 |             |      | 0  | 0.0  |
| 129 | L!     | 80.2 | 2.8 |             | 1.07 | 70 | 97.2 |
| 129 | MainCh | 71.1 |     |             |      |    |      |

Res# stands for residue number; ResType for residues type; RSCC for real-space correlation coefficient;  $\Delta$ Cont for minimum difference within other RSCC; MainCh for main chain atoms; MS for mass spectrometry; H-bond for hydrogen bond; ! for resolved residue.

Supplementary Table 3: Residues of lysozyme having ambiguity assignment from both crystallographic and mass spectrometry data but being resolved by phylogenetic analysis

| Res# | ResType | Crystallography |               |             | MS<br>PrimaryScore | ConSurf |      |      |
|------|---------|-----------------|---------------|-------------|--------------------|---------|------|------|
|      |         | RSCC            | $\Delta$ Cont | Observation |                    | n       | %    |      |
| 2    | V!      | 92.5            | 2.3           | Exposed     |                    | 104     | 47.5 |      |
| 2    | T       | 90.2            | 5.5           |             |                    | 20      | 9.1  |      |
| 2    | MainCh  | 94.6            |               |             |                    |         |      |      |
| 19   | S       | 85              | 3.6           |             |                    | 1       | 0.6  |      |
| 19   | A       | 81.4            | 2.4           |             |                    | 0       | 0.0  |      |
| 19   | V       | 79              | 1.4           |             |                    | 0       | 0.0  |      |
| 19   | L       | 77.6            | 0.7           |             |                    | 1       | 0.6  |      |
| 19   | I       | 76.9            | 0.3           |             |                    | 0       | 0.0  |      |
| 19   | K       | 76.6            | 1.7           |             |                    | 4       | 2.5  |      |
| 19   | G       | 74.9            | 0.1           |             |                    | 124     | 76.5 |      |
| 19   | T       | 74.8            | 1.3           |             |                    | 1       | 0.6  |      |
| 19   | N!      | 73.5            | 2.1           |             | 1.88               | 14      | 8.6  |      |
| 19   | D       | 71.4            | 1             |             | 2.02               | 2       | 1.2  |      |
| 19   | MainCh  | 91.8            |               |             |                    |         |      |      |
| 21   | K       | 83.1            | 1.7           |             | 2.40               | 17      | 6.1  |      |
| 21   | A       | 81.4            | 0.5           |             |                    | 8       | 2.9  |      |
| 21   | R!      | 80.9            | 3.1           |             | 2.71               | 58      | 20.8 |      |
| 21   | MainCh  | 95.7            |               |             |                    |         |      |      |
| 27   | N!      | 95.6            | 0.6           | 4 H-bonds   | 2.78               | 122     | 42.4 |      |
| 27   | D       | 95              | 3.4           |             |                    | 2.55    | 72   | 25.0 |
| 27   | MainCh  | 93.8            |               |             |                    |         |      |      |
| 37   | N!      | 93.1            | 0.6           | 1 H-bonds   | 2.44               | 55      | 18.6 |      |
| 37   | D       | 92.5            | 1.3           |             |                    | 2.13    | 14   | 4.7  |
| 37   | L       | 91.2            | 4.4           |             |                    |         | 2    | 0.7  |
| 37   | MainCh  | 94.7            |               |             |                    |         |      |      |
| 41   | E       | 95.4            | 1.3           |             | 1.95               | 5       | 1.7  |      |
| 41   | Q!      | 94.1            | 3.2           |             | 2.44               | 35      | 11.8 |      |

|    |        |      |     |           |      |     |      |
|----|--------|------|-----|-----------|------|-----|------|
| 41 | MainCh | 93.5 |     |           |      |     |      |
| 46 | D      | 94.6 | 1.3 | 3 H-bonds | 3.27 | 0   | 0.0  |
| 46 | N!     | 93.3 | 2.5 |           | 3.11 | 106 | 41.9 |
| 46 | MainCh | 88.8 |     |           |      |     |      |
| 48 | D!     | 96.2 | 0.3 | 5 H-bonds | 3.27 | 178 | 62.0 |
| 48 | N      | 96   | 9.6 |           | 2.63 | 53  | 18.5 |
| 48 | MainCh | 93.8 |     |           |      |     |      |
| 52 | D!     | 93.8 | 0.9 | 5 H-bonds | 3.28 | 212 | 71.1 |
| 52 | N      | 92.9 | 6.1 |           | 3.01 | 32  | 10.7 |
| 52 | MainCh | 96.6 |     |           |      |     |      |
| 57 | E      | 91.1 | 0.2 |           | 1.44 | 1   | 0.3  |
| 57 | Q!     | 90.9 | 5   |           | 1.32 | 293 | 98.3 |
| 57 | MainCh | 93.9 |     |           |      |     |      |
| 59 | N!     | 85.1 | 0.1 | 4 H-bonds | 3.28 | 207 | 69.5 |
| 59 | M      | 84.9 | 2.3 |           |      | 0   | 0.0  |
| 59 | D      | 82.6 | 0.4 |           | 3.12 | 2   | 0.7  |
| 59 | MainCh | 90.7 |     |           |      |     |      |
| 66 | D!     | 95.6 | 1.4 | 8 H-bonds | 1.00 | 110 | 37.2 |
| 66 | N      | 94.3 | 8.2 |           | 0.60 | 45  | 15.2 |
| 66 | MainCh | 96.2 |     |           |      |     |      |
| 85 | T!     | 89.6 | 2   |           | 2.98 | 45  | 16.4 |
| 85 | S      | 87.6 | 3   |           | 3.85 | 35  | 12.7 |
| 85 | MainCh | 91.1 |     |           |      |     |      |
| 86 | A      | 84.1 | 3.7 | 2 H-bonds | 2.00 | 6   | 2.2  |
| 86 | V      | 80.4 | 0.6 |           |      | 1   | 0.4  |
| 86 | S!     | 79.8 | 3.9 |           | 3.85 | 30  | 10.8 |
| 86 | T      | 75.8 | 1.4 |           | 1.88 | 2   | 0.7  |
| 86 | MainCh | 91.3 |     |           |      |     |      |
| 87 | D!     | 91.7 | 0.1 | 2 H-bonds | 3.85 | 179 | 64.4 |
| 87 | N      | 91.6 | 1.4 |           | 2.94 | 76  | 27.3 |
| 87 | Q      | 90.3 | 4.4 |           |      | 0   | 0.0  |
| 87 | MainCh | 94.2 |     |           |      |     |      |
| 93 | N!     | 91.8 | 2.9 | 1 H-bonds | 3.85 | 24  | 8.6  |
| 93 | D      | 88.9 | 1   |           | 3.56 | 4   | 1.4  |
| 93 | MainCh | 93   |     |           |      |     |      |
| 97 | A      | 83.4 | 2.8 |           |      | 1   | 0.4  |
| 97 | K!     | 80.7 | 0.2 |           | 2.92 | 107 | 38.5 |
| 97 | MainCh | 94.1 |     |           |      |     |      |

|     |        |      |     |           |      |     |      |
|-----|--------|------|-----|-----------|------|-----|------|
| 101 | N      | 92.9 | 1   | 1 H-bonds | 3.39 | 4   | 2.9  |
| 101 | D!     | 91.9 | 1   |           | 3.09 | 60  | 43.8 |
| 101 | L      | 90.9 | 6.8 |           |      | 0   | 0.0  |
| 101 | MainCh | 91.2 |     |           |      |     |      |
| 103 | N      | 88   | 1.3 | 1 H-bonds | 2.91 | 24  | 8.7  |
| 103 | L      | 86.7 | 0.9 |           |      | 2   | 0.7  |
| 103 | D!     | 85.9 | 6.6 |           | 3.39 | 9   | 3.3  |
| 103 | MainCh | 94.4 |     |           |      |     |      |
| 113 | N!     | 96.2 | 2.4 | 2 H-bonds | 1.07 | 61  | 24.0 |
| 113 | D      | 93.8 | 1.2 |           |      | 7   | 2.8  |
| 113 | MainCh | 91.3 |     |           |      |     |      |
| 119 | D!     | 91.5 | 1.6 | 2 H-bonds | 1.67 | 102 | 50.7 |
| 119 | N      | 90   | 0.9 |           | 1.07 | 29  | 14.4 |
| 119 | L      | 89.1 | 7   |           |      | 0   | 0.0  |
| 119 | MainCh | 92.3 |     |           |      |     |      |

Res# stands for residue number; ResType for residues type; RSCC for real-space correlation coefficient;  $\Delta$ Cont for contrast difference within other RSCC; MainCh for main chain atoms; MS for mass spectrometry; H-bond for hydrogen bond; ! for resolved residue.

Supplementary Table 4: Residues of lysozyme having ambiguity assignment from both crystallographic and mass spectrometry data but being resolved by intact mass MS measurement.

| Res# | ResType | Crystallography |               |             | MS           | ConSurf |      |
|------|---------|-----------------|---------------|-------------|--------------|---------|------|
|      |         | RSCC            | $\Delta$ Cont | Observation | PrimaryScore | n       | %    |
| 70   | G       | 79.8            | 3             |             | 2.15         | 7       | 3.7  |
| 70   | P!      | 76.8            | 3             |             |              | 81      | 42.9 |
| 70   | A       | 73.8            | 8.7           |             |              | 3       | 1.6  |
| 70   | MainCh  | 87              |               |             |              |         |      |
| 121  | S       | 87.3            | 6.5           |             | 1.59         | 103     | 57.9 |
| 121  | L       | 80.8            | 0.0           |             |              | 1       | 0.6  |
| 121  | A       | 80.8            | 0.9           |             |              | 11      | 6.2  |
| 121  | G       | 79.9            | 1.7           |             |              | 2       | 1.1  |
| 121  | N       | 78.2            | 0.4           |             |              | 7       | 3.9  |
| 121  | V       | 77.8            | 2.3           |             |              | 1       | 0.6  |
| 121  | C       | 75.5            | 2.5           |             |              | 0       | 0.0  |
| 121  | K       | 73.0            | 1.0           |             |              | 4       | 2.2  |
| 121  | D       | 72.0            | 3.9           |             |              | 12      | 6.7  |
| 121  | T       | 68.1            | 0.7           |             |              | 17      | 9.6  |
| 121  | I       | 67.4            | 2.0           |             |              | 1       | 0.6  |
| 121  | Y       | 65.4            | 1.1           |             |              | 2       | 1.1  |
| 121  | E       | 64.3            | 1.8           |             |              | 5       | 2.8  |
| 121  | H       | 62.5            | 1.2           |             |              | 0       | 0.0  |
| 121  | R       | 61.3            | 2.4           |             |              | 5       | 2.8  |
| 121  | P       | 58.9            | 4.9           |             |              | 3       | 1.7  |
| 121  | Q!      | 54.0            | 1.3           |             |              | 2       | 1.1  |
| 121  | MainCh  | 91.8            |               |             |              |         |      |

|     |        |      |     |      |    |      |
|-----|--------|------|-----|------|----|------|
| 128 | S      | 88.2 | 2.6 |      | 0  | 0.0  |
| 128 | T      | 85.6 | 1.4 |      | 2  | 1.6  |
| 128 | V      | 84.2 | 1.3 | 0.82 | 0  | 0.0  |
| 128 | A      | 82.8 | 5   |      | 0  | 0.0  |
| 128 | D      | 77.8 | 2.7 | 0.90 | 20 | 16.1 |
| 128 | P      | 75.1 | 0.5 | 1.07 | 0  | 0.0  |
| 128 | L      | 74.6 | 2.5 |      | 0  | 0.0  |
| 128 | I      | 72.1 | 2.1 |      | 0  | 0.0  |
| 128 | N      | 70   | 1.1 | 1.64 | 15 | 12.1 |
| 128 | C      | 68.9 | 8.4 |      | 0  | 0.0  |
| 128 | R!     | 50.5 |     |      | 13 | 10.5 |
| 128 | MainCh | 79.4 |     |      |    |      |

Supplementary Table 5: Residues of the basement membrane-specific heparan sulphate proteoglycan core protein (BaM) resolved by crystallography, MS and/or phylogenetic analysis

| Res# | ResType | Crystallography |               |       | MS Score     |        | ConSurf |      |
|------|---------|-----------------|---------------|-------|--------------|--------|---------|------|
|      |         | RSCC            | $\Delta$ Cont | RSCC* | PrimaryScore | -10lgP | n       | %    |
| 1769 | P       | 90.6            | 8.5           | 87.5  | 5.21         |        | 88      | 89.8 |
| 1770 | I       | 93.7            | 5             | 95    | 5.21         |        | 33      | 75   |
| 1771 | M       | 84.4            | 1.1           | 94.3  | 5.21         |        | 2       | 2.6  |
| 1772 | V       | 92.2            | 0.6           | 94.7  | 5.21         |        | 46      | 38.7 |
| 1773 | T       | 89.8            | 1             | 94.8  | 5.21         |        | 16      | 12.5 |
| 1774 | V       | 92.4            | 4.2           | 96    | 5.21         |        | 30      | 22.4 |
| 1775 | E       | 83.9            | 2.3           | 91.8  | 5.21         |        | 25      | 17.9 |
| 1776 | E       | 71.2            | 3.8           | 78.4  | 5.21         |        | 48      | 30.8 |
| 1777 | Q       | 48.5            | 2.7           | 71.8  | 5.21         |        | 9       | 5.1  |
| 1778 | R       | 70.4            | 0.7           | 91.9  | 5.21         |        | 30      | 15.8 |
| 1779 | S       | 62.7            | 4             | 91.1  |              | 19.15  | 60      | 28.8 |
| 1780 | Q       | 95.7            | 0.1           | 93.7  |              | 19.15  | 74      | 32.7 |
| 1781 | S       | 88.3            | 2.2           | 95.5  |              | 19.15  | 49      | 19.3 |
| 1782 | V       | 94.7            | 2.1           | 96.2  |              | 19.15  | 183     | 69.1 |
| 1783 | R       | 46.2            | 0.9           | 91.9  |              | 19.15  | 61      | 22.8 |
| 1784 | P       | 91.8            | 11.2          | 96    |              | 19.15  | 57      | 20.5 |
| 1785 | G       | 76              | 28.5          | 91.1  |              | 19.15  | 261     | 91.3 |
| 1786 | A       | 78.3            | 3.3           | 92.5  |              | 19.15  | 41      | 14.2 |
| 1787 | D       | 92.5            | 4.7           | 94.5  |              | 19.15  | 59      | 20.3 |
| 1788 | V       | 90.9            | 0.5           | 95.2  |              | 19.15  | 174     | 59.2 |
| 1789 | T       | 92.1            | 0.5           | 94.8  |              | 19.15  | 93      | 31.6 |
| 1790 | F       | 93.4            | 4.6           | 95.3  |              | 19.15  | 138     | 46.9 |
| 1791 | I       | 90.8            | 0.4           | 96    |              | 19.15  | 25      | 8.5  |
| 1792 | C       | 82.1            | 6.5           | 91.8  |              | 19.15  | 298     | 100  |
| 1793 | T       | 92.6            | 9             | 94.5  |              | 19.15  | 54      | 18.1 |
| 1794 | A       | 89.2            | 12            | 95.4  |              | 19.15  | 185     | 61.9 |
| 1795 | K       | 83.7            | 0.7           | 95.1  |              | 19.15  | 31      | 10.4 |
| 1796 | S       | 94.3            | 5.7           | 94.9  |              | 19.15  | 50      | 16.9 |
| 1799 | P       | 91.1            | 11.6          | 94.5  |              |        | 225     | 75   |
| 1802 | T       | 96.5            | 8.1           | 96    |              |        | 121     | 40.3 |
| 1805 | W       | 97.1            | 12.8          | 95.8  |              |        | 299     | 99.7 |
| 1811 | G       | 86.4            | 8.1           | 95    |              |        | 160     | 53.7 |
| 1813 | L       | 95.4            | 7.5           | 94    |              |        | 237     | 80.1 |

|      |   |      |      |      |     |      |
|------|---|------|------|------|-----|------|
| 1822 | G | 90.3 | 6.7  | 95   | 228 | 76   |
| 1824 | L | 95.2 | 4.4  | 94.3 | 275 | 91.7 |
| 1831 | P | 92.2 | 15.6 | 95.2 | 117 | 39   |
| 1833 | D | 95.2 | 3.7  | 94   | 259 | 86.3 |
| 1835 | G | 88.4 | 30.5 | 92.3 | 291 | 97   |
| 1837 | Y | 95.7 | 8.7  | 95.2 | 297 | 99   |
| 1839 | C | 96.5 | 15.3 | 95.4 | 300 | 100  |

Res# stands for residue number; ResType for residues type; RSCC for real-space correlation coefficient; \* for main chain atoms; MS for mass spectrometry.

Supplementary Table 6: Residues of BaM having assignment ambiguity from phylogenetic analysis being resolved by crystallographic data

| Res# | ResType | Crystallography |             | ConSurf |      |
|------|---------|-----------------|-------------|---------|------|
|      |         | RSCC            | Observation | n       | %    |
| 1798 | S!      | 84.5            |             | 13      | 50   |
| 1798 | R       | 53.5            |             | 3       | 11.5 |
| 1798 | MainCh  | 94.8            |             |         |      |
| 1800 | A!      | 97.2            |             | 49      | 16.4 |
| 1800 | T       | 68.9            |             | 38      | 12.7 |
| 1800 | P       | 58.3            |             | 65      | 21.7 |
| 1800 | MainCh  | 96.4            |             |         |      |
| 1801 | Y!      | 96.4            |             | 29      | 9.7  |
| 1801 | P       | 58.6            |             | 182     | 60.9 |
| 1801 | MainCh  | 95.4            |             |         |      |
| 1803 | L!      | 95.5            | hydrophobic | 99      | 33   |
| 1803 | I       | 81.8            |             | 78      | 26   |
| 1803 | V       | 74.6            |             | 74      | 24.7 |
| 1803 | MainCh  | 95.6            |             |         |      |
| 1804 | V!      | 96.1            | hydrophobic | 45      | 15   |
| 1804 | T       | 94.7            |             | 87      | 29   |
| 1804 | S       | 87.1            |             | 43      | 14.3 |
| 1804 | MainCh  | 96              |             |         |      |
| 1806 | T!      | 94.4            | hydrophilic | 106     | 35.3 |
| 1806 | S       | 89.3            |             | 74      | 24.7 |
| 1806 | R       | 49.9            |             | 28      | 9.3  |
| 1806 | MainCh  | 94.3            |             |         |      |
| 1807 | R!      | 91.5            |             | 146     | 48.7 |
| 1807 | K       | 84              |             | 112     | 37.3 |
| 1807 | MainCh  | 92.4            |             |         |      |
| 1808 | L!      | 87.2            |             | 50      | 16.7 |
| 1808 | V       | 80.9            |             | 39      | 13   |
| 1808 | N       | 73.8            |             | 30      | 10   |

|      |        |      |             |     |      |
|------|--------|------|-------------|-----|------|
| 1808 | E      | 62   |             | 32  | 10.7 |
| 1808 | MainCh | 93.9 |             |     |      |
| 1814 | P!     | 91   |             | 226 | 75.6 |
| 1814 | S      | 56.7 |             | 28  | 9.4  |
| 1814 | MainCh | 93.7 |             |     |      |
| 1815 | S!     | 86.2 |             | 70  | 23.4 |
| 1815 | A      | 75.5 |             | 28  | 9.4  |
| 1815 | P      | 62   |             | 39  | 13   |
| 1815 | MainCh | 93.3 |             |     |      |
| 1816 | R!     | 93.3 |             | 72  | 24.3 |
| 1816 | S      | 82.2 |             | 42  | 14.2 |
| 1816 | G      | 71.7 |             | 35  | 11.8 |
| 1816 | N      | 63.5 |             | 39  | 13.2 |
| 1816 | MainCh | 95.2 |             |     |      |
| 1817 | A!     | 94.3 |             | 128 | 43.2 |
| 1817 | S      | 75.5 |             | 49  | 16.6 |
| 1817 | R      | 18.5 |             | 37  | 12.5 |
| 1817 | MainCh | 92.9 |             |     |      |
| 1819 | D!     | 95.8 | hydrophilic | 41  | 13.9 |
| 1819 | N      | 94.5 |             | 2   | 0.7  |
| 1819 | L      | 90.4 |             | 36  | 12.2 |
| 1819 | I      | 77.8 |             | 42  | 14.3 |
| 1819 | V      | 59.1 |             | 86  | 29.3 |
| 1819 | MainCh | 95.2 |             |     |      |
| 1821 | N!     | 91.9 | hydrophilic | 92  | 30.7 |
| 1821 | D      | 89   |             | 38  | 12.7 |
| 1821 | G      | 60.4 |             | 87  | 29   |
| 1821 | MainCh | 95.2 |             |     |      |
| 1823 | !      | 94.4 |             | 50  | 16.7 |
| 1823 | T      | 88.4 |             | 55  | 18.3 |
| 1823 | V      | 86.5 |             | 48  | 16   |
| 1823 | S      | 84.4 |             | 36  | 12   |
| 1823 | MainCh | 93.6 |             |     |      |
| 1825 | T!     | 93.4 | hydrophilic | 139 | 46.5 |
| 1825 | R      | 63.4 |             | 30  | 10   |
| 1825 | MainCh | 93.5 |             |     |      |
| 1826 | !      | 93   |             | 225 | 75   |
| 1826 | L      | 80.7 |             | 43  | 14.3 |
| 1826 | MainCh | 93   |             |     |      |
| 1827 | S      | 82.7 |             | 19  | 6.3  |

|      |        |      |             |     |      |
|------|--------|------|-------------|-----|------|
| 1827 | K      | 79.5 |             | 9   | 3    |
| 1827 | R!     | 73.8 |             | 72  | 24   |
| 1827 | P      | 55.1 |             | 64  | 21.3 |
| 1827 | MainCh | 92.6 |             |     |      |
| 1828 | N!     | 92.1 | hydrophilic | 118 | 39.6 |
| 1828 | D      | 90.7 |             | 23  | 7.7  |
| 1828 | S      | 75.5 |             | 33  | 11.1 |
| 1828 | A      | 66.4 |             | 30  | 10.1 |
| 1828 | MainCh | 94.5 |             |     |      |
| 1829 | V!     | 94.8 | hydrophobic | 186 | 62   |
| 1829 | I      | 91.6 |             | 29  | 9.7  |
| 1829 | A      | 74.6 |             | 51  | 17   |
| 1829 | MainCh | 95.8 |             |     |      |
| 1830 | Q!     | 93.8 | hydrophilic | 73  | 24.3 |
| 1830 | E      | 91.2 |             | 12  | 4    |
| 1830 | S      | 82.8 |             | 32  | 10.7 |
| 1830 | R      | 67.8 |             | 38  | 12.7 |
| 1830 | T      | 63.2 |             | 63  | 21   |
| 1830 | MainCh | 95.6 |             |     |      |
| 1832 | S!     | 92.8 |             | 80  | 26.7 |
| 1832 | E      | 65.7 |             | 85  | 28.3 |
| 1832 | MainCh | 95.6 |             |     |      |
| 1834 | A!     | 91.6 |             | 141 | 47   |
| 1834 | S      | 78.9 |             | 61  | 20.3 |
| 1834 | MainCh | 94.3 |             |     |      |
| 1836 | T!     | 90.6 | hydrophilic | 78  | 26   |
| 1836 | V      | 88.6 |             | 31  | 10.3 |
| 1836 | I      | 82.5 |             | 29  | 9.7  |
| 1836 | Q      | 38.1 |             | 29  | 9.7  |
| 1836 | MainCh | 93   |             |     |      |
| 1840 | T!     | 95.7 | hydrophilic | 148 | 49.3 |
| 1840 | V      | 90.7 |             | 38  | 12.7 |
| 1840 | MainCh | 96.2 |             |     |      |
| 1841 | G!     | 94.7 |             | 45  | 15.3 |
| 1841 | A      | 75.9 |             | 217 | 73.6 |
| 1841 | MainCh | 95   |             |     |      |
| 1845 | H      | 85.2 |             | 12  | 5    |
| 1845 | F!     | 84.8 |             | 27  | 11.3 |
| 1845 | A      | 73.9 |             | 43  | 18   |
| 1845 | V      | 59.1 |             | 50  | 20.9 |
| 1845 | MainCh | 93.8 |             |     |      |

|      |        |      |             |     |      |
|------|--------|------|-------------|-----|------|
| 1847 | M!     | 83   |             | 24  | 11.6 |
| 1847 | A      | 82.2 |             | 9   | 4.3  |
| 1847 | S      | 81.2 |             | 32  | 15.5 |
| 1847 | T      | 74   |             | 38  | 18.4 |
| 1847 | MainCh | 92.7 |             |     |      |
| 1848 | D!     | 93.8 | hydrophilic | 63  | 31.7 |
| 1848 | N      | 92.9 |             | 5   | 2.5  |
| 1848 | S      | 76.7 |             | 21  | 10.6 |
| 1848 | A      | 68   |             | 34  | 17.1 |
| 1848 | V      | 60.4 |             | 34  | 17.1 |
| 1848 | MainCh | 95.2 |             |     |      |
| 1850 | G!     | 88.7 |             | 33  | 17.6 |
| 1850 | A      | 78.7 |             | 50  | 26.6 |
| 1850 | S      | 47.3 |             | 26  | 13.8 |
| 1850 | MainCh | 94.2 |             |     |      |
| 1851 | T!     | 94.5 | hydrophilic | 69  | 38.3 |
| 1851 | R      | 57.5 |             | 22  | 12.2 |
| 1851 | MainCh | 94.2 |             |     |      |
| 1852 | A!     | 93.6 |             | 85  | 47.8 |
| 1852 | V      | 72.1 |             | 38  | 21.3 |
| 1852 | MainCh | 94.8 |             |     |      |
| 1854 | L!     | 94.2 | hydrophobic | 136 | 84.5 |
| 1854 | V      | 71.8 |             | 16  | 9.9  |
| 1854 | MainCh | 94   |             |     |      |
| 1855 | H!     | 89.4 |             | 28  | 20   |
| 1855 | N      | 78.5 |             | 14  | 10   |
| 1855 | Y      | 72.6 |             | 17  | 12.1 |
| 1855 | S      | 69.3 |             | 14  | 10   |
| 1855 | R      | 56.6 |             | 16  | 11.4 |
| 1855 | MainCh | 95.4 |             |     |      |
| 1856 | V!     | 90.8 | hydrophobic | 109 | 83.8 |
| 1856 | I      | 85.4 |             | 17  | 13.1 |
| 1856 | MainCh | 94.8 |             |     |      |

Res# stands for residue number; ResType for residues type; RSCC for real-space correlation coefficient;  $\Delta$ Cont for minimum difference within other RSCC; MainCh for main chain atoms; H-bond for hydrogen bond; ! for resolved residue.

Supplementary Table 7: Residues of BaM having ambiguity assignment from crystallographic, and mass spectrometry and phylogenetic data

| Res# | ResType | Crystallography |             | ConSurf |      |
|------|---------|-----------------|-------------|---------|------|
|      |         | RSCC            | Observation | n       | %    |
| 1797 | S       | 85.1            |             | 39      | 13.2 |

|      |        |      |             |     |      |
|------|--------|------|-------------|-----|------|
| 1797 | K!     | 82.6 |             | 27  | 9.2  |
| 1797 | N      | 78.5 |             | 34  | 11.5 |
| 1797 | MainCh | 90.6 |             |     |      |
| 1809 | H!     | 91.7 |             | 3   | 2.7  |
| 1809 | N      | 77.6 |             | 12  | 10.6 |
| 1809 | D      | 77.4 |             | 29  | 25.7 |
| 1809 | S      | 68.2 |             | 14  | 12.4 |
| 1809 | G      | 56.6 |             | 26  | 23   |
| 1809 | MainCh | 93.4 |             |     |      |
| 1810 | N!     | 95.1 | hydrophilic | 64  | 21.3 |
| 1810 | D      | 92.3 |             | 37  | 12.3 |
| 1810 | G      | 62.5 |             | 96  | 32   |
| 1810 | MainCh | 96   |             |     |      |
| 1812 | S      | 88.9 |             | 30  | 10.1 |
| 1812 | K!     | 83.8 |             | 25  | 8.4  |
| 1812 | A      | 71.1 |             | 32  | 10.7 |
| 1812 | P      | 51.9 |             | 61  | 20.5 |
| 1812 | MainCh | 94.4 |             |     |      |
| 1818 | A      | 88.4 |             | 12  | 4.1  |
| 1818 | V      | 81.4 |             | 47  | 15.9 |
| 1818 | T      | 77.2 |             | 28  | 9.5  |
| 1818 | Q      | 75.8 |             | 30  | 10.1 |
| 1818 | M!     | 71   |             | 20  | 6.8  |
| 1818 | R      | 66.8 |             | 49  | 16.6 |
| 1818 | MainCh | 92.9 |             |     |      |
| 1820 | F!     | 94.8 |             | 22  | 7.4  |
| 1820 | K      | 83.1 |             | 31  | 10.4 |
| 1820 | R      | 72.4 |             | 43  | 14.4 |
| 1820 | E      | 72   |             | 29  | 9.7  |
| 1820 | MainCh | 93.8 |             |     |      |
| 1838 | V!     | 91.5 |             | 80  | 26.7 |
| 1838 | T      | 89.6 |             | 43  | 14.3 |
| 1838 | I      | 87.7 |             | 38  | 12.7 |
| 1838 | MainCh | 95.4 |             |     |      |
| 1842 | S!     | 88.1 | hydrophilic | 123 | 42.3 |
| 1842 | T      | 85.9 |             | 58  | 19.9 |
| 1842 | MainCh | 94.3 |             |     |      |
| 1844 | A      | 84.4 |             | 22  | 8    |
| 1844 | E      | 79.7 |             | 18  | 6.5  |
| 1844 | Q      | 79.2 |             | 10  | 3.6  |
| 1844 | M!     | 74.9 |             | 21  | 7.6  |
| 1844 | S      | 71.2 |             | 33  | 12   |

|      |        |      |     |      |
|------|--------|------|-----|------|
| 1844 | N      | 53.9 | 39  | 14.2 |
| 1844 | MainCh | 91.2 |     |      |
| 1846 | A!     | 89.2 | 15  | 6.8  |
| 1846 | G      | 65.2 | 163 | 73.8 |
| 1846 | MainCh | 92.8 |     |      |
| 1849 | Q!     | 93.8 | 42  | 21.3 |
| 1849 | E      | 93.2 | 51  | 25.9 |
| 1849 | T      | 63   | 39  | 19.8 |
| 1849 | MainCh | 95.1 |     |      |
| 1853 | V      | 88.9 | 20  | 12   |
| 1853 | T!     | 86.7 | 53  | 31.7 |
| 1853 | R      | 54.2 | 18  | 10.8 |
| 1853 | MainCh | 92.6 |     |      |
| 1857 | S      | 77.4 | 0   | 0    |
| 1857 | E      | 76.9 | 7   | 11.9 |
| 1857 | Q!     | 76.1 | 37  | 62.7 |
| 1857 | MainCh | 82.3 |     |      |

Res# stands for residue number; ResType for residues type; RSCC for real-space correlation coefficient;  $\Delta$ Cont for contrast difference within other RSCC; MainCh for main chain atoms; MS for mass spectrometry; H-bond for hydrogen bond; ! for resolved residue.

Supplementary Table 8: Residues of metalloproteinase resolved by crystallography and MS and/or phylogenetic analysis

| Res# | ResType | Crystallography |               |       | MS           | ConSurf |      |
|------|---------|-----------------|---------------|-------|--------------|---------|------|
|      |         | RSCC            | $\Delta$ Cont | RSCC* | PrimaryScore | n       | %    |
| 2    | F       | 92.2            | 4.0           | 94.3  | 1.04         | 10      | 76.9 |
| 3    | S       | 91.8            | 5.5           | 94.3  | 1.33         | 26      | 44.8 |
| 4    | P       | 93.7            | 12.5          | 97.1  | 1.33         | 30      | 15.9 |
| 5    | R       | 96.9            | 8.2           | 97.9  | 1.33         | 87      | 33.2 |
| 6    | Y       | 97.3            | 5             | 98.1  | 3.03         | 226     | 85.3 |
| 7    | I       | 96.8            | 3.8           | 97.7  | 3.03         | 75      | 28.3 |
| 8    | E       | 97.7            | 4.6           | 98.3  | 3.03         | 247     | 93.6 |
| 10   | A       | 95.2            | 12.1          | 97.7  | 3.03         | 15      | 5.7  |
| 13   | A       | 95.3            | 9.9           | 97.8  | 3.03         | 161     | 60.8 |
| 16   | G       | 92              | 21.3          | 97.8  | 3.03         | 24      | 9.0  |
| 17   | M       | 96.5            | 4.5           | 97.9  | 3.03         | 67      | 24.7 |
| 18   | F       | 95.6            | 4.6           | 96    | 3.03         | 140     | 52.2 |
| 20   | K       | 97              | 9.5           | 96.8  | 3.03         | 149     | 55.6 |
| 21   | Y       | 97.2            | 7.2           | 96.5  | 2.26         | 115     | 42.6 |
| 23   | S       | 95.7            | 8.8           | 97.2  | 2.36         | 34      | 12.6 |
| 25   | L       | 93.7            | 3.3           | 96.2  | 2.36         | 102     | 39.1 |
| 27   | T       | 96.9            | 3.3           | 97.3  | 2.36         | 50      | 18.5 |
| 28   | I       | 95.2            | 4             | 97.3  | 2.36         | 81      | 30.0 |
| 31   | R       | 96.9            | 9.6           | 96.9  | 2.08         | 213     | 78.3 |
| 33   | H       | 93.6            | 4.4           | 97.2  | 2.52         | 9       | 3.3  |

|     |   |      |      |      |      |     |      |
|-----|---|------|------|------|------|-----|------|
| 34  | E | 92.4 | 5.8  | 97.5 | 2.52 | 206 | 75.7 |
| 35  | M | 98.6 | 4.7  | 98.7 | 2.52 | 39  | 14.3 |
| 38  | T | 97.5 | 5.6  | 98.1 | 2.52 | 24  | 8.8  |
| 41  | G | 95.6 | 21.5 | 98   | 2.52 | 10  | 3.5  |
| 42  | F | 96.9 | 6.5  | 98.4 | 2.52 | 108 | 36.7 |
| 43  | Y | 98.4 | 6.4  | 98.5 | 1.36 | 257 | 86.8 |
| 44  | S | 91.5 | 8.1  | 97.4 | 1.36 | 4   | 1.4  |
| 45  | S | 96.6 | 11.6 | 97.8 | 1.36 | 33  | 11.1 |
| 48  | A | 97   | 11.1 | 98.2 | 1.36 | 2   | 0.7  |
| 50  | A | 94.4 | 13.9 | 95.4 | 1.36 | 4   | 1.3  |
| 51  | S | 97.1 | 7.5  | 97   | 1.36 | 9   | 3.0  |
| 52  | L | 97   | 4.6  | 97.4 | 1.36 | 291 | 98.0 |
| 53  | A | 96   | 8.4  | 98.2 | 1.36 | 5   | 1.7  |
| 54  | N | 96.9 | 3    | 97.5 | 1.36 | 4   | 1.3  |
| 58  | W | 98.3 | 12.2 | 97.8 | 1.36 | 294 | 99.0 |
| 59  | S | 95.8 | 7.8  | 96.5 | 1.36 | 146 | 49.2 |
| 63  | L | 97.1 | 3    | 97.6 | 1.82 | 43  | 14.5 |
| 64  | I | 96.7 | 6.9  | 97.9 | 1.82 | 171 | 57.6 |
| 68  | K | 95.3 | 10   | 98.1 | 1.82 | 16  | 5.4  |
| 70  | S | 97.6 | 7.9  | 98.2 | 1.65 | 31  | 10.4 |
| 72  | K | 93.6 | 4.6  | 97.3 | 1.65 | 3   | 1.0  |
| 73  | T | 98.2 | 4.7  | 97.6 | 2.26 | 256 | 85.6 |
| 74  | L | 96.9 | 3.2  | 98.1 | 2.26 | 290 | 97.0 |
| 75  | T | 96.7 | 5.7  | 97.2 | 2.26 | 11  | 3.7  |
| 76  | S | 96.7 | 8.8  | 97.3 | 2.26 | 79  | 26.4 |
| 77  | F | 98   | 8    | 97.8 | 2.26 | 294 | 98.3 |
| 78  | G | 91.1 | 29.5 | 97   | 2.26 | 47  | 15.7 |
| 79  | S | 85.5 | 4.3  | 95.7 |      | 27  | 9.0  |
| 80  | W | 98.5 | 13.6 | 97.6 | 2.26 | 284 | 95.0 |
| 81  | R | 97.2 | 10.2 | 97.8 | 2.26 | 276 | 92.3 |
| 83  | R | 93.2 | 6    | 98.1 | 1.80 | 42  | 14.1 |
| 87  | P | 96.2 | 17   | 96.4 | 1.80 | 107 | 35.9 |
| 88  | R | 92.9 | 5.8  | 98   | 1.80 | 211 | 70.8 |
| 90  | S | 95.6 | 9.6  | 98.6 | 4.59 | 37  | 12.4 |
| 91  | H | 97.9 | 3.8  | 98.6 | 4.59 | 234 | 78.3 |
| 93  | H | 98.3 | 3.3  | 98.8 | 4.59 | 10  | 3.3  |
| 94  | A | 97.2 | 7.9  | 98.4 | 4.59 | 275 | 92.0 |
| 96  | L | 97.2 | 3.7  | 97.9 | 4.59 | 265 | 89.2 |
| 97  | L | 92.9 | 3.7  | 98   | 4.59 | 125 | 42.1 |
| 98  | T | 97.1 | 4.6  | 98.4 | 4.59 | 220 | 74.1 |
| 99  | T | 97.3 | 4.7  | 98.1 | 4.59 | 3   | 1.0  |
| 100 | I | 94.2 | 3.9  | 96.8 | 4.59 | 98  | 33.0 |
| 102 | F | 98.1 | 4.8  | 97.5 | 4.59 | 264 | 88.9 |
| 103 | D | 97.7 | 3.1  | 97.8 | 4.59 | 67  | 22.6 |
| 105 | Y | 95.4 | 4.5  | 97.4 | 4.59 | 1   | 0.3  |
| 107 | I | 96   | 4.3  | 98   | 4.59 | 118 | 39.6 |
| 108 | G | 92.8 | 13.9 | 98.2 | 4.59 | 296 | 99.3 |
| 109 | R | 96.7 | 7    | 98.2 | 4.59 | 10  | 3.4  |
| 111 | R | 94.5 | 7    | 97.3 | 3.04 | 6   | 2.0  |
| 112 | S | 93.2 | 2.9  | 96.1 | 1.19 | 2   | 0.7  |

|     |   |      |            |      |      |     |       |
|-----|---|------|------------|------|------|-----|-------|
| 113 | G | 94.5 | 10.6       | 98.2 | 1.19 | 79  | 26.5  |
| 114 | K | 96.6 | 5.2        | 98.8 | 1.19 | 1   | 0.3   |
| 115 | M | 98.2 | 4.4        | 97.3 | 1.19 | 220 | 73.8  |
| 116 | C | 97.9 | 10.3       | 97.9 | 1.19 | 298 | 100.0 |
| 118 | P | 95.5 | 18.3       | 97.4 | 1.19 | 68  | 22.9  |
| 121 | S | 98   | 9.1        | 98   | 2.37 | 293 | 98.7  |
| 123 | G | 93.6 | 9.2        | 98.3 | 2.37 | 227 | 76.7  |
| 129 | S | 96.2 | 6          | 97.5 | 2.37 | 194 | 65.5  |
| 130 | K | 86.9 | 3.3        | 96.9 | 2.37 | 25  | 8.5   |
| 133 | L | 96.6 | 4.9        | 97.9 | 2.97 | 102 | 34.6  |
| 134 | W | 97.6 | 8          | 98.7 | 2.97 | 1   | 0.3   |
| 136 | A | 97   | 15.3       | 97.8 | 2.97 | 266 | 89.9  |
| 139 | M | 98.7 | 5.3        | 98.2 | 2.97 | 159 | 53.7  |
| 138 | T | 97.5 | 6.4        | 98.2 | 2.97 | 245 | 82.8  |
| 140 | A | 97   | 12.7       | 98   | 2.97 | 282 | 95.3  |
| 141 | H | 97.1 | 4.8        | 98.2 | 2.97 | 296 | 100.0 |
| 143 | L | 96.6 | 3.7        | 97.4 | 2.97 | 121 | 40.9  |
| 144 | G | 96.5 | 13.3       | 98.8 | 2.97 | 295 | 99.7  |
| 145 | H | 98.3 | 5.7        | 98.2 | 2.97 | 296 | 100.0 |
| 149 | M | 98.2 | 4.9        | 98   | 2.97 | 222 | 75.3  |
| 151 | H | 96.8 | 5.9        | 98.5 | 2.97 | 292 | 99.0  |
| 155 | C | 90.7 | <b>2.1</b> | 96.4 | 2.97 | 289 | 98.6  |
| 156 | S | 96.4 | 8.5        | 97.3 | 2.97 | 32  | 10.9  |
| 157 | C | 91.9 | <b>1.6</b> | 97.6 | 2.97 | 239 | 87.9  |
| 158 | G | 96.7 | 15.1       | 98.6 | 2.97 | 53  | 18.3  |
| 159 | A | 97.7 | 16.5       | 98.4 | 2.97 | 97  | 33.9  |
| 160 | K | 95.5 | 7.5        | 98.5 | 2.97 | 18  | 6.3   |
| 161 | S | 97.9 | 9.5        | 97.7 | 2.21 | 58  | 20.5  |
| 162 | C | 93.2 | <b>2.7</b> | 97.6 | 2.21 | 281 | 98.9  |
| 163 | I | 97.4 | 8.9        | 97.6 | 2.21 | 198 | 69.7  |
| 164 | M | 98.8 | 5.6        | 98   | 2.21 | 280 | 98.6  |
| 165 | A | 96.8 | 9.5        | 98.1 | 2.21 | 129 | 45.6  |
| 166 | S | 95.8 | 8          | 96.2 | 2.21 | 21  | 7.4   |
| 168 | L | 97.9 | 3.4        | 96.9 | 2.21 | 65  | 24.0  |
| 169 | S | 95.9 | 10.5       | 97.3 | 2.21 | 85  | 30.4  |
| 170 | K | 94.9 | 7.2        | 97.2 | 2.21 | 6   | 2.2   |
| 172 | K | 92.9 | 6.5        | 97.3 | 2.54 | 2   | 0.7   |
| 174 | Y | 97.4 | 6.1        | 97.3 | 2.63 | 25  | 9.0   |
| 175 | A | 95.7 | 13         | 98.3 | 2.63 | 4   | 1.4   |
| 176 | F | 97.7 | 5.9        | 97.8 | 2.63 | 265 | 94.6  |
| 177 | S | 97.2 | 7.7        | 98.2 | 2.63 | 262 | 93.6  |
| 180 | S | 96.9 | 9          | 97.6 | 2.63 | 256 | 91.8  |
| 184 | Y | 97.4 | 6.8        | 97.9 | 2.63 | 56  | 20.2  |
| 187 | F | 96.9 | 6.5        | 97   | 2.63 | 93  | 33.8  |
| 191 | H | 94.9 | 5.4        | 98.6 | 1.50 | 10  | 3.7   |
| 192 | N | 97.7 | 3.1        | 98.2 | 1.50 | 30  | 11.1  |
| 193 | P | 95.7 | 12.3       | 97.6 | 1.50 | 108 | 39.9  |
| 195 | C | 91.1 | 3.5        | 97.4 | 1.50 | 271 | 100.0 |
| 196 | I | 98   | 6          | 98.4 | 1.50 | 62  | 23.0  |
| 197 | L | 95.9 | 4.2        | 97.4 | 1.50 | 99  | 37.9  |

|     |   |      |      |      |      |     |       |
|-----|---|------|------|------|------|-----|-------|
| 200 | P | 91.6 | 16.9 | 92.8 | 0.82 | 246 | 100.0 |
|-----|---|------|------|------|------|-----|-------|

Res# stands for residue number; ResType for residues type; RSCC for real-space correlation coefficient;  $\Delta$ Cont for contrast difference within other RSCC; \* for main chain atoms; MS for mass spectrometry. RSCC in bold denotes cysteine partially occupied having  $\Delta$ Cont less than 3.0.

Supplementary Table 9: Residues of metalloproteinase having assignment ambiguity from crystallographic data being resolved by mass spectrometry

| Res# | ResType | Crystallography |               |             | MS<br>PrimaryScore | ConSurf |   |   |     |
|------|---------|-----------------|---------------|-------------|--------------------|---------|---|---|-----|
|      |         | RSCC            | $\Delta$ Cont | Observation |                    | n       | % |   |     |
| 1    | V       | 78              | 1.2           | No H-bond   | 1.04               |         |   |   |     |
| 1    | G       | 76.8            | 2.6           |             |                    |         |   |   |     |
| 1    | T!      | 74.2            | 0.9           |             |                    |         |   |   |     |
| 1    | I       | 73.3            | 1.3           |             |                    |         |   |   |     |
| 1    | A       | 72              | 1.4           |             |                    |         |   |   |     |
| 1    | L       | 70.6            | 0.1           |             |                    |         |   |   |     |
| 1    | MainCh  | 88.3            |               |             |                    |         |   |   |     |
| 9    | L!      | 87.7            | 0.9           | 3.03        | 211                | 79.9    |   |   |     |
| 9    | V       | 86.8            | 0.8           |             |                    |         |   |   |     |
| 9    | S       | 86              | 2.1           |             |                    |         |   |   |     |
| 9    | I       | 83.9            | 0.2           |             |                    |         |   |   |     |
| 9    | A       | 83.7            | 0.2           |             |                    |         |   |   |     |
| 9    | MainCh  | 97.4            |               |             |                    |         |   |   |     |
| 11   | V!      | 97.7            | 1.6           | 3.03        | 64                 | 24.2    |   |   |     |
| 11   | T       | 96.1            | 3.2           |             |                    |         |   |   |     |
| 11   | MainCh  | 97.4            |               |             |                    |         |   |   |     |
| 12   | V!      | 95.5            | 1.8           | 3.03        | 256                | 96.6    |   |   |     |
| 12   | T       | 93.7            | 2.4           |             |                    |         |   |   |     |
| 12   | MainCh  | 97              |               |             |                    |         |   |   |     |
| 14   | D!      | 97.6            | 1.1           | 3.03        | 263                | 99.2    |   |   |     |
| 14   | N       | 96.5            | 4.7           |             |                    |         |   |   |     |
| 14   | L       | 91.8            | 10.2          |             |                    |         |   |   |     |
| 14   | MainCh  | 97.7            |               |             |                    |         |   |   |     |
| 19   | V       | 94.4            | 0.7           | 3.03        | 10                 | 3.7     |   |   |     |
| 19   | T!      | 93.7            | 6.5           |             |                    |         |   |   |     |
| 19   | MainCh  | 95.7            |               |             |                    |         |   |   |     |
| 22   | N!      | 92.6            | 2.7           | 2.36        | 76                 | 34.7    |   |   |     |
| 22   | S       | 89.9            | 3.8           |             |                    |         |   |   |     |
| 22   | L       | 86.1            | 2.1           |             |                    |         |   |   |     |
| 22   | D       | 84              | 3.3           |             |                    |         |   |   |     |
| 22   | MainCh  | 96.5            |               |             |                    |         |   |   |     |
| 29   | S       | 90.5            | 2.2           | 2.08        | 1                  | 0.4     |   |   |     |
| 29   | V       | 88.3            | 0.2           |             |                    |         |   |   |     |
| 29   | A       | 88.1            | 5.9           |             |                    |         |   |   |     |
| 29   | T       | 82.2            | 2.2           |             |                    |         |   |   |     |
| 29   | Q       | 80              | 1.3           |             |                    |         |   |   |     |
| 29   | L       | 78.7            | 0.4           |             |                    |         |   |   |     |
| 29   | I       | 78.3            | 0.4           |             |                    |         |   |   |     |
| 29   | E       | 77.9            | 1.1           |             |                    |         |   |   |     |
|      |         |                 |               |             |                    |         |   | 9 | 3.3 |
|      |         |                 |               |             |                    |         |   | 6 | 2.2 |

|    |        |      |     |                               |      |     |      |
|----|--------|------|-----|-------------------------------|------|-----|------|
| 29 | K      | 76.8 | 1.6 | Double occupancy              |      | 101 | 37.0 |
| 29 | R!     | 74.5 | 2.1 | 1 H-bond and exposed residue  | 2.36 | 103 | 37.7 |
| 29 | MainCh | 98   |     |                               |      |     |      |
| 30 | T!     | 95.7 | 1.7 | 2 H-bonds                     | 2.08 | 45  | 16.5 |
| 30 | V      | 94   | 3.4 |                               |      | 4   | 1.5  |
| 30 | MainCh | 97.3 |     |                               |      |     |      |
| 32 | V!     | 98.1 | 1.8 | Hydrophobic and buried region | 2.52 | 70  | 25.7 |
| 32 | T      | 96.3 | 3.2 |                               |      | 7   | 2.6  |
| 32 | MainCh | 97.7 |     |                               |      |     |      |
| 36 | V!     | 97.2 | 1.2 | Hydrophobic and buried region | 2.52 | 126 | 46.2 |
| 36 | T      | 96   | 4.5 |                               |      | 4   | 1.5  |
| 36 | MainCh | 98.5 |     |                               |      |     |      |
| 37 | N!     | 86   | 0.4 |                               | 2.52 | 255 | 93.8 |
| 37 | T      | 85.6 | 0.2 |                               |      | 0   | 0.0  |
| 37 | S      | 85.4 | 0.2 | 1 H-bond and exposed residue  |      | 6   | 2.2  |
| 37 | V      | 85.2 | 6.3 |                               |      | 0   | 0.0  |
| 37 | L      | 78.9 | 7.7 |                               |      | 4   | 1.5  |
| 37 | D      | 71.2 | 4.3 |                               | 1.36 | 1   | 0.4  |
| 37 | MainCh | 97.2 |     |                               |      |     |      |
| 39 | V!     | 96.7 | 2.5 | Hydrophobic and buried region | 2.52 | 174 | 63.3 |
| 39 | T      | 94.2 | 3.4 |                               |      | 0   | 0.0  |
| 39 | MainCh | 98.8 |     |                               |      |     |      |
| 40 | N!     | 94.7 | 1.7 | 3 H-bonds and exposed residue | 2.52 | 117 | 42.2 |
| 40 | L      | 93   | 0.1 |                               |      | 1   | 0.4  |
| 40 | D      | 92.9 | 5.4 |                               | 1.36 | 146 | 52.7 |
| 40 | MainCh | 98.1 |     |                               |      |     |      |
| 46 | V!     | 96.4 | 0.8 | Hydrophobic and buried region | 1.36 | 12  | 4.1  |
| 46 | T      | 95.6 | 4.7 |                               |      | 0   | 0.0  |
| 46 | MainCh | 97.7 |     |                               |      |     |      |
| 47 | D      | 96.8 | 1.5 | 2 H-bonds and exposed residue |      | 23  | 7.7  |
| 47 | N!     | 95.3 | 3.9 |                               | 1.36 | 213 | 71.7 |
| 47 | L      | 91.4 | 7.3 |                               |      | 1   | 0.3  |
| 47 | MainCh | 97.7 |     |                               |      |     |      |
| 49 | D      | 95.6 | 1.9 | 4 H-bonds and exposed residue |      | 4   | 1.3  |
| 49 | N!     | 93.7 | 0.4 |                               | 1.36 | 1   | 0.3  |
| 49 | L      | 93.3 | 4.2 |                               |      | 2   | 0.7  |
| 49 | MainCh | 98   |     |                               |      |     |      |
| 55 | L!     | 96.2 | 2.5 | Hydrophobic and buried region | 1.36 | 228 | 76.8 |
| 55 | N      | 93.7 | 1.1 |                               |      | 0   | 0.0  |
| 55 | D      | 92.6 | 7.8 |                               |      | 0   | 0.0  |
| 55 | MainCh | 96.9 |     |                               |      |     |      |
| 56 | E      | 96.3 | 2.1 |                               |      | 268 | 90.2 |
| 56 | Q!     | 94.2 | 2.2 |                               | 1.36 | 5   | 1.7  |
| 56 | MainCh | 97   |     |                               |      |     |      |
| 57 | V!     | 97.3 | 2.7 | Hydrophobic and buried region | 1.36 | 135 | 45.6 |

|     |        |      |     |                               |      |     |      |
|-----|--------|------|-----|-------------------------------|------|-----|------|
| 57  | T      | 94.6 | 1.4 |                               |      | 1   | 0.3  |
| 57  | MainCh | 97.5 |     |                               |      |     |      |
| 60  | V      | 85.5 | 0.9 |                               | 1.32 | 1   | 0.3  |
| 60  | !!     | 84.6 | 0.7 |                               | 1.36 | 1   | 0.3  |
| 60  | T      | 83.9 | 0.9 |                               |      | 4   | 1.4  |
| 60  | S      | 83   | 1.9 |                               |      | 16  | 5.5  |
| 60  | A      | 81.1 | 5.2 |                               |      | 0   | 0.0  |
| 60  | MainCh | 96.7 |     |                               |      |     |      |
| 61  | S      | 91.2 | 1.2 | Exposed residue               |      | 21  | 7.1  |
| 61  | K!     | 90   | 4.1 |                               | 1.36 | 37  | 12.5 |
| 61  | MainCh | 97.6 |     |                               |      |     |      |
| 62  | D!     | 97.7 | 1.6 | 4 H-bonds and exposed residue | 1.82 | 273 | 91.9 |
| 62  | N      | 96.1 | 6.3 |                               |      | 22  | 7.4  |
| 62  | L      | 89.8 | 5.5 |                               |      | 0   | 0.0  |
| 62  | MainCh | 98.2 |     |                               |      |     |      |
| 65  | S      | 87.6 | 1   |                               |      | 32  | 10.8 |
| 65  | I      | 86.6 | 0.2 |                               |      | 16  | 5.4  |
| 65  | K!     | 86.4 | 0.3 |                               | 1.82 | 23  | 7.7  |
| 65  | MainCh | 97   |     |                               |      |     |      |
| 66  | V!     | 98.4 | 1.9 | Hydrophobic and buried region | 1.82 | 191 | 64.3 |
| 66  | T      | 96.5 | 3.6 |                               |      | 3   | 1.0  |
| 66  | MainCh | 97.4 |     |                               |      |     |      |
| 67  | Q      | 95.9 | 2.9 |                               |      | 21  | 7.1  |
| 67  | E!     | 93   | 5.7 |                               | 1.82 | 29  | 9.8  |
| 67  | MainCh | 97.5 |     |                               |      |     |      |
| 69  | D!     | 96.1 | 1.6 | 3 H-bonds and exposed residue | 1.65 | 82  | 27.6 |
| 69  | N      | 94.5 | 5.3 |                               |      | 82  | 27.6 |
| 69  | L      | 89.2 | 3.7 |                               |      | 0   | 0.0  |
| 69  | MainCh | 96.9 |     |                               |      |     |      |
| 89  | !!     | 96.6 | 1.7 |                               | 4.59 | 20  | 6.7  |
| 89  | T      | 94.9 | 0.8 |                               |      | 11  | 3.7  |
| 89  | V      | 94.1 | 6.4 |                               |      | 7   | 2.3  |
|     | MainCh | 98.4 |     |                               |      |     |      |
| 92  | D!     | 98.3 | 2.5 | Coordinating Ca <sup>2+</sup> | 4.59 | 297 | 99.3 |
| 92  | N      | 95.8 | 5   |                               |      | 0   | 0.0  |
| 92  | L      | 90.8 | 7.9 |                               |      | 0   | 0.0  |
| 92  | MainCh | 97.8 |     |                               |      |     |      |
| 95  | Q!     | 97.3 | 2.2 |                               | 4.59 | 263 | 88.0 |
| 95  | E      | 95.1 | 5.2 |                               |      | 0   | 0.0  |
| 95  | MainCh | 97.7 |     |                               |      |     |      |
| 101 | V!     | 95.9 | 1.3 | Exposed residue               | 4.59 | 8   | 2.7  |
| 101 | T      | 94.6 | 3.5 |                               |      | 21  | 7.0  |
| 101 | MainCh | 96.4 |     |                               |      |     |      |
| 104 | D      | 95.4 | 0.3 | 1 H-bond and exposed residue  | 4.59 | 7   | 2.3  |
| 104 | N!     | 95.1 | 1.7 |                               |      | 6   | 2.0  |

|     |        |      |     |                               |      |     |      |
|-----|--------|------|-----|-------------------------------|------|-----|------|
| 104 | L      | 93.4 | 8   |                               |      | 0   | 0.0  |
| 104 | MainCh | 96.6 |     |                               |      |     |      |
| 106 | V!     | 95.6 | 2.5 |                               | 4.59 | 20  | 6.7  |
| 106 | T      | 93.1 | 4.3 |                               |      | 250 | 83.6 |
| 106 | MainCh | 97.8 |     |                               |      |     |      |
| 110 | S!     | 96.2 | 2.2 |                               | 3.04 | 14  | 4.7  |
| 110 | T      | 94   | 6.5 |                               |      | 4   | 1.3  |
| 110 | MainCh | 96.4 |     |                               |      |     |      |
| 117 | D!     | 97.2 | 0.9 | 3 H-bonds and exposed residue | 1.19 | 20  | 6.7  |
| 117 | N      | 96.3 | 3.8 |                               |      | 12  | 4.0  |
| 117 | L      | 92.5 | 6.9 |                               |      | 11  | 3.7  |
| 117 | MainCh | 97.9 |     |                               |      |     |      |
| 119 | S      | 89.3 | 0.6 |                               |      | 8   | 3.5  |
| 119 | K      | 88.7 | 2.5 |                               |      | 31  | 13.7 |
| 119 | Q      | 80   | 1.2 |                               |      | 8   | 3.5  |
| 119 | E!     | 78.8 | 1.4 |                               | 1.19 | 73  | 32.3 |
| 119 | MainCh | 96.7 |     |                               |      |     |      |
| 120 | Q!     | 94.1 | 1.7 |                               | 2.37 | 63  | 21.2 |
| 120 | E      | 92.4 | 0.2 |                               | 1.22 | 6   | 2.0  |
| 120 | MainCh | 97.5 |     |                               |      |     |      |
| 122 | V!     | 97   | 1.5 | Hydrophobic and buried region | 2.37 | 65  | 21.9 |
| 122 | T      | 95.5 | 5.3 |                               |      | 12  | 4.0  |
| 122 | MainCh | 97.5 |     |                               |      |     |      |
| 124 | V!     | 97.1 | 2   | Hydrophobic and buried region | 2.37 | 194 | 65.5 |
| 124 | T      | 95.1 | 5.2 |                               |      | 0   | 0.0  |
| 124 | MainCh | 98.3 |     |                               |      |     |      |
| 125 | V!     | 97.9 | 1.3 | Hydrophobic and buried region | 2.37 | 91  | 31.1 |
| 125 | T      | 96.6 | 5.6 |                               |      | 4   | 1.4  |
| 125 | MainCh | 98.7 |     |                               |      |     |      |
| 126 | K      | 91.7 | 3.3 |                               | 1.19 | 8   | 2.7  |
| 126 | R!     | 88.4 | 0.6 |                               | 2.37 | 8   | 2.7  |
| 126 | MainCh | 97.7 |     |                               |      |     |      |
| 127 | D!     | 97.6 | 1   | 4 H-bonds and exposed residue | 2.37 | 278 | 93.9 |
| 127 | N      | 96.6 | 5.3 |                               |      | 4   | 1.4  |
| 127 | L      | 90.4 | 4.9 |                               |      | 0   | 0.0  |
| 127 | MainCh | 97.8 |     |                               |      |     |      |
| 128 | H!     | 98   | 2.8 |                               | 2.37 | 252 | 84.8 |
| 128 | F      | 95.2 | 5.9 |                               |      | 5   | 1.7  |
| 128 | MainCh | 96.9 |     |                               |      |     |      |
| 131 | L      | 92.3 | 0.6 | 2 H-bonds and exposed residue | 2.97 | 26  | 8.8  |
| 131 | D      | 91.7 | 0.7 |                               |      | 11  | 3.7  |
| 131 | N!     | 91   | 5.6 |                               |      | 112 | 37.8 |
| 131 | MainCh | 93.7 |     |                               |      |     |      |
| 132 | N!     | 96.5 | 1.7 | 3 H-bonds and exposed residue | 2.97 | 25  | 8.4  |

|     |        |      |     |                               |      |     |      |
|-----|--------|------|-----|-------------------------------|------|-----|------|
| 132 | L      | 94.8 | 0.2 |                               |      | 9   | 3.0  |
| 132 | D      | 94.6 | 5.7 |                               |      | 2   | 0.7  |
| 132 | MainCh | 97.2 |     |                               |      |     |      |
| 135 | V!     | 97.1 | 1.9 | Hydrophobic and buried region | 2.97 | 164 | 55.4 |
| 135 | T      | 95.2 | 2.7 |                               |      | 4   | 1.4  |
| 135 | MainCh | 98   |     |                               |      |     |      |
| 137 | V!     | 97.5 | 1.7 | Hydrophobic and buried region | 2.97 | 59  | 19.9 |
| 137 | T      | 95.8 | 1.8 |                               |      | 12  | 4.1  |
| 137 | MainCh | 98   |     |                               |      |     |      |
| 142 | E!     | 97   | 2.9 |                               | 2.97 | 282 | 95.3 |
| 142 | Q      | 94.1 | 6.9 |                               |      | 13  | 4.4  |
| 142 | MainCh | 97.4 |     |                               |      |     |      |
| 148 | N      | 93.4 | 0.5 | 1 H-bond and exposed residue  |      | 0   | 0.0  |
| 148 | D!     | 92.9 | 2.5 |                               | 2.97 | 1   | 0.3  |
| 148 | L      | 90.4 | 5.8 |                               |      | 0   | 0.0  |
| 148 | MainCh | 96.7 |     |                               |      |     |      |
| 150 | H!     | 95.2 | 2.7 |                               | 2.97 | 17  | 5.8  |
| 150 | F      | 92.5 | 1.9 |                               |      | 4   | 1.4  |
| 150 | MainCh | 97.4 |     |                               |      |     |      |
| 154 | T!     | 96.7 | 2.4 | 1 H-bond and exposed residue  | 2.97 | 11  | 3.8  |
| 154 | V      | 94.3 | 3.4 |                               |      | 5   | 1.7  |
| 154 | MainCh | 96.5 |     |                               |      |     |      |
| 167 | V!     | 92.9 | 0   | Exposed residue               | 2.21 | 15  | 5.4  |
| 167 | T      | 92.9 | 0.1 |                               |      | 28  | 10.0 |
| 167 | I      | 92.8 | 6.7 |                               |      | 5   | 1.8  |
| 167 | MainCh | 97.1 |     |                               |      |     |      |
| 171 | V      | 95.9 | 0.8 |                               |      | 33  | 12.0 |
| 171 | T!     | 95.1 | 6.4 |                               | 2.54 | 14  | 5.1  |
| 171 | MainCh | 97.8 |     |                               |      |     |      |
| 173 | V      | 90.1 | 1.6 | 1 H-bond and exposed residue  |      | 2   | 0.7  |
| 173 | S      | 88.5 | 1.2 |                               | 2.63 | 36  | 12.9 |
| 173 | T!     | 87.3 | 3.6 |                               | 0.82 | 0   | 0.0  |
| 173 | MainCh | 96.1 |     |                               |      |     |      |
| 179 | T      | 88   | 4.6 | Double occupancy              |      | 0   | 0.0  |
| 179 | S      | 83.4 | 0.9 |                               |      | 0   | 0.0  |
| 179 | C!     | 82.5 | 5.6 |                               | 2.63 | 276 | 98.6 |
| 179 | MainCh | 96.9 |     |                               |      |     |      |
| 186 | T!     | 95.3 | 2.5 | 2 H-bonds and exposed residue | 2.63 | 33  | 12.0 |
| 186 | V      | 92.8 | 3.6 |                               |      | 10  | 3.6  |
| 186 | MainCh | 97   |     |                               |      |     |      |
| 188 | L!     | 95.1 | 1   | Hydrophobic and buried region | 2.63 | 178 | 65.0 |
| 188 | N      | 94.1 | 0.7 |                               |      | 0   | 0.0  |
| 188 | D      | 93.4 | 3.2 |                               | 0.82 | 0   | 0.0  |
| 188 | MainCh | 95.7 |     |                               |      |     |      |

|     |        |      |      |                               |      |      |      |      |
|-----|--------|------|------|-------------------------------|------|------|------|------|
| 189 | T!     | 96.1 | 2.9  | 1 H-bond                      | 2.63 | 21   | 7.7  |      |
| 189 | I      | 93.2 | 0.4  |                               |      | 20   | 7.4  |      |
| 189 | V      | 92.8 | 2.2  |                               |      | 1    | 0.4  |      |
| 189 | MainCh | 96.4 |      |                               |      |      |      |      |
| 190 | S      | 92.7 | 1.4  | 2.63                          | 40   | 14.7 |      |      |
| 190 | K!     | 91.3 | 4.2  |                               |      |      | 82   | 30.1 |
| 190 | MainCh | 98.3 |      |                               |      |      |      |      |
| 194 | Q!     | 96.8 | 0.6  | 1.50                          | 48   | 17.7 |      |      |
| 194 | E      | 96.2 | 10.8 |                               |      |      | 6    | 2.2  |
| 194 | MainCh | 97.7 |      |                               |      |      |      |      |
| 198 | N!     | 95.1 | 2.8  | Coordinating Ca <sup>2+</sup> | 0.82 | 213  | 82.6 |      |
| 198 | D      | 92.3 | 6.2  |                               |      | 33   | 12.8 |      |
| 198 | L      | 86.1 | 2.9  |                               |      | 0    | 0.0  |      |
| 198 | MainCh | 95.9 |      |                               |      |      |      |      |
| 199 | K      | 84.1 | 0.3  | 0.82                          | 51   | 20.2 |      |      |
| 199 | E!     | 83.8 | 0.9  |                               |      |      | 23   | 9.1  |
| 199 | A      | 82.9 | 4.2  |                               |      |      | 26   | 10.3 |
| 199 | L      | 78.7 | 0.3  |                               |      |      | 19   | 7.5  |
| 199 | S      | 78.4 | 0    |                               |      |      | 4    | 1.6  |
| 199 | Q      | 78.4 | 0.4  |                               |      |      | 2    | 0.8  |
| 199 | MainCh | 96.1 |      |                               |      |      |      |      |

Res# stands for residue number; ResType for residues type; RSCC for real-space correlation coefficient;  $\Delta$ Cont for contrast difference within other RSCC; MainCh for main chain atoms; MS for mass spectrometry; H-bond for hydrogen bond; ! for resolved residue.

Supplementary Table 10: Residues of metalloproteinase having ambiguity assignment from both crystallographic and mass spectrometry data but being resolved by phylogenetic analysis

| Res# | ResType | Crystallography |               | Observation                               | MS<br>PrimaryScore | ConSurf |      |    |      |
|------|---------|-----------------|---------------|-------------------------------------------|--------------------|---------|------|----|------|
|      |         | RSCC            | $\Delta$ Cont |                                           |                    | n       | %    |    |      |
| 15   | N!      | 96              | 0.2           | 3 H-bonds                                 | 2.99               | 124     | 46.8 |    |      |
| 15   | D       | 95.8            | 2.8           |                                           | 3.03               | 3       | 1.1  |    |      |
| 15   | L       | 93              | 7.8           |                                           | 0                  | 0.0     |      |    |      |
| 15   | MainCh  | 97.3            |               |                                           |                    |         |      |    |      |
| 71   | N!      | 89.5            | 1.8           | Density looks like<br>is covalently bound | 1.05               | 59      | 19.8 |    |      |
| 71   | D       | 87.7            | 3             |                                           | 42                 | 14.1    |      |    |      |
| 71   | K       | 81.4            | 1.8           |                                           | 7                  | 2.3     |      |    |      |
| 71   | R       | 77.5            | 0.6           |                                           | 1.65               | 7       | 2.3  |    |      |
| 71   | MainCh  | 97.1            |               |                                           |                    |         |      |    |      |
| 82   | E!      | 96.3            | 3             | 1.80                                      | 66                 | 22.1    |      |    |      |
| 82   | Q       | 93.3            | 3.4           |                                           |                    |         | 1.05 | 48 | 16.1 |
| 82   | MainCh  | 97.4            |               |                                           |                    |         |      |    |      |
| 84   | N       | 91.9            | 0.8           | 4 H-bonds and exposed                     | 1.15               | 21      | 8.7  |    |      |
| 84   | D!      | 91.1            | 4.3           |                                           | 1.80               | 70      | 28.9 |    |      |
| 84   | L       | 78.8            | 2             |                                           | 0                  | 0.0     |      |    |      |
| 84   | MainCh  | 96.5            |               |                                           |                    |         |      |    |      |
| 85   | L!      | 96.5            | 5             | Hydrophobic and buried                    | 1.15               | 284     | 95.0 |    |      |

|     |        |      |     |                        |      |     |      |
|-----|--------|------|-----|------------------------|------|-----|------|
| 85  | N      | 91.5 | 1   |                        |      | 0   | 0.0  |
| 85  | D      | 90.5 | 6.8 |                        | 1.80 | 0   | 0.0  |
| 85  | MainCh | 97.5 |     |                        |      |     |      |
| 86  | L!     | 96.7 | 5.3 |                        | 1.80 | 209 | 70.1 |
| 86  | N      | 91.4 | 1.3 |                        | 1.15 | 1   | 0.3  |
| 86  | D      | 90.1 | 6.3 |                        |      | 0   | 0.0  |
| 86  | MainCh | 97.5 |     |                        |      |     |      |
| 146 | N!     | 98   | 0.6 | 4 H-bonds and buried   | 2.26 | 275 | 92.9 |
| 146 | D      | 97.4 | 4   |                        | 2.97 | 1   | 0.3  |
| 146 | L      | 93.4 | 0.1 |                        |      | 0   | 0.0  |
| 146 | MainCh | 97.2 |     |                        |      |     |      |
| 147 | L!     | 96.4 | 3.5 | Hydrophobic and buried | 2.97 | 184 | 62.2 |
| 147 | N      | 92.9 | 0.8 |                        | 2.26 | 0   | 0.0  |
| 147 | D      | 92.1 | 5.2 |                        |      | 0   | 0.0  |
| 147 | MainCh | 97.8 |     |                        |      |     |      |
| 152 | D!     | 97.3 | 2.9 | 3 H-bonds and buried   | 2.97 | 288 | 98.0 |
| 152 | N      | 94.4 | 6.1 |                        | 2.26 | 2   | 0.7  |
| 152 | L      | 88.3 | 4.7 |                        |      | 0   | 0.0  |
| 152 | MainCh | 98   |     |                        |      |     |      |
| 153 | D!     | 95.6 | 0.2 | 3 H-bonds and exposed  | 2.97 | 52  | 17.7 |
| 153 | N      | 95.4 | 0.2 |                        |      | 27  | 9.2  |
| 153 | L      | 95.2 | 4.3 |                        | 2.26 | 10  | 3.4  |
| 153 | MainCh | 96.2 |     |                        |      |     |      |
| 178 | V      | 87.2 | 1.1 |                        | 2.54 | 0   | 0.0  |
| 178 | T!     | 86.1 | 1.9 |                        | 2.63 | 21  | 7.5  |
| 178 | MainCh | 96.4 |     |                        |      |     |      |

Res# stands for residue number; ResType for residues type; RSCC for real-space correlation coefficient;  $\Delta$ Cont for contrast difference within other RSCC; MainCh for main chain atoms; MS for mass spectrometry; H-bond for hydrogen bond; ! for resolved residue.

Supplementary Table 11: Residues of metalloproteinase having ambiguity assignment from crystallographic, mass spectrometry and phylogenetic analysis data

| Res# | ResType | Crystallography |               | Observation                  | MS<br>PrimaryScore | ConSurf |      |
|------|---------|-----------------|---------------|------------------------------|--------------------|---------|------|
|      |         | RSCC            | $\Delta$ Cont |                              |                    | n       | %    |
| 24   | N?      | 97.4            | 2             | 2 H-bonds                    | 2.36               | 88      | 32.6 |
| 24   | D?      | 95.4            | 4.2           |                              | 2.21               | 120     | 44.4 |
| 24   | L       | 91.2            | 7.3           |                              |                    | 1       | 0.4  |
| 24   | MainCh  | 96.8            |               |                              |                    |         |      |
| 26   | N?      | 88              | 4.7           | 1 H-bond and exposed residue | 2.36               | 35      | 13.3 |
| 26   | L       | 83.3            | 0.7           |                              |                    | 1       | 0.4  |
| 26   | D?      | 82.6            | 1.8           |                              | 2.24               | 31      | 11.8 |
| 26   | S       | 80.8            | 0.3           |                              |                    | 6       | 2.3  |
| 26   | MainCh  | 96.9            |               |                              |                    |         |      |
| 181  | Q?      | 96.1            | 4.7           |                              | 2.54               | 38      | 13.6 |
| 181  | E?      | 91.4            | 1.2           |                              | 2.63               | 17      | 6.1  |
| 181  | MainCh  | 97.7            |               |                              |                    |         |      |

|     |        |      |     |                               |      |     |      |
|-----|--------|------|-----|-------------------------------|------|-----|------|
| 182 | N?     | 89.8 | 1.2 | 2 H-bonds and exposed residue | 2.54 | 22  | 7.9  |
| 182 | L      | 88.6 | 2   |                               | 1    | 0.4 |      |
| 182 | D?     | 84.2 | 2.8 |                               | 2.63 | 14  | 5.0  |
| 182 | MainCh | 97.2 |     |                               |      |     |      |
| 183 | Q?     | 95.8 | 0   |                               | 2.54 | 52  | 18.6 |
| 183 | E?     | 95.8 | 7.2 |                               | 2.63 | 46  | 16.4 |
| 183 | MainCh | 97.4 |     |                               |      |     |      |
| 185 | Q?     | 92   | 3.2 |                               | 2.63 | 50  | 18.1 |
| 185 | E?     | 88.8 | 1.4 |                               | 2.54 | 68  | 24.5 |
| 185 | MainCh | 96.8 |     |                               |      |     |      |

Res# stands for residue number; ResType for residues type; RSCC for real-space correlation coefficient;  $\Delta$ Cont for contrast difference within other RSCC; MainCh for main chain atoms; MS for mass spectrometry; H-bond for hydrogen bond; ! for resolved residue.

Supplementary Table 12: Residues of MjTX-I resolved by crystallography and MS and/or phylogenetic analysis

| Res# | ResType | Cryst mon ABCD |               | Cryst mon A |               | Cryst mon B |               | Cryst mon C |               | Cryst mon D |               | MS           | ConSurf |       |
|------|---------|----------------|---------------|-------------|---------------|-------------|---------------|-------------|---------------|-------------|---------------|--------------|---------|-------|
|      |         | RSCC           | $\Delta$ Cont | RSCC        | $\Delta$ Cont | RSCC        | $\Delta$ Cont | RSCC        | $\Delta$ Cont | RSCC        | $\Delta$ Cont | PrimaryScore | #Struct | %     |
| 1    | S       | 90.5           | 10.6          | 91.5        | 6.4           | 94.9        | 4.4           | 93.3        | 11.4          |             |               | 3.49         | 40      | 100.0 |
| 2    | L       | 91.1           | 13.1          | 93.6        | 3.8           |             |               | 85.2        | 11.7          |             |               | 3.49         | 114     | 78.1  |
| 3    | V       | 86.9           | 9.6           |             |               |             |               | 87.9        | 4.6           | 79          | 10.2          | 3.49         | 25      | 14.5  |
| 5    | L       | 92.5           | 5             | 95.2        | 5.4           | 92.9        | 3.6           | 89.7        | 4.1           | 89.6        | 5.5           | 3.49         | 95      | 47.0  |
| 6    | G       | 85.7           | 21.7          | 94          | 29.4          | 92.4        | 18.8          | 69.4        | 4.9           | 81          | 32.1          | 3.49         | 62      | 29.4  |
| 7    | K       |                |               |             |               | 91.6        | 6.0           |             |               |             |               |              | 63      | 29.6  |
| 8    | M       | 95.3           | 5             |             |               |             |               | 95.4        | 5.7           | 87.8        | 4.6           | 3.49         | 171     | 79.5  |
| 9    | I       | 93.6           | 3.6           |             |               |             |               | 94.8        | 4.4           | 91.2        | 7             | 3.49         | 161     | 74.2  |
| 10   | L       | 90.3           | 7             | 91.7        | 3.1           | 92          | 4.4           |             |               | 84.2        | 5.1           | 3.49         | 11      | 5.0   |
| 11   | Q       | 91.8           | 3.6           |             |               |             |               |             |               | 88.5        | 9.3           | 3.49         | 24      | 11.0  |
| 12   | E       | 94.4           | 3.4           |             |               |             |               | 93.2        | 5.1           | 93.8        | 5.9           | 3.49         | 9       | 4.0   |
| 13   | T       | 94.8           | 5.5           | 96.7        | 5.6           | 93.8        | 6             | 95          | 5.7           | 94.2        | 5.7           | 3.49         | 176     | 72.7  |
| 14   | G       | 86.5           | 31.3          | 89.7        | 21.5          | 90.8        | 28.8          | 78          | 18            | 83.3        | 34.8          | 3.49         | 198     | 77.6  |
| 15   | K       |                |               |             |               | 88          | 4.1           |             |               | 88.4        | 3.8           | 3.49         | 102     | 36.8  |
| 16   | N       | 89.5           | 5.2           | 91.6        | 4.3           |             |               | 91          | 5.5           | 88.5        | 5.3           | 2.45         | 72      | 25.6  |
| 17   | P       | 91.8           | 14            | 92.4        | 12.8          | 95.9        | 19.9          | 92.1        | 11.7          | 87.4        | 1.1           | 3.84         | 141     | 49.3  |
| 20   | S       | 91             | 10.1          | 86.8        | 3.5           | 92.6        | 10.3          | 91.2        | 5.1           | 94.4        | 8.6           | 3.84         | 75      | 25.3  |
| 21   | Y       | 95.6           | 8.7           | 96.1        | 9.3           | 95.8        | 7.3           | 94.8        | 5.4           | 96          | 10.7          | 3.84         | 248     | 83.5  |
| 22   | G       | 77.4           | 25.4          | 81.3        | 24.9          | 86.9        | 24.3          | 70.5        | 11.2          | 51.2        | 3             | 3.84         | 41      | 13.9  |
| 23   | A       | 89.8           | 10.7          | 91.4        | 17.3          | 93.7        | 8.4           | 83.6        | 12.9          | 87.5        | 23.1          | 3.84         | 13      | 4.4   |
| 24   | Y       | 95.9           | 6             | 95.6        | 6.8           | 95.6        | 5.2           | 96.1        | 5.4           | 95.4        | 4.3           | 3.84         | 297     | 99.7  |
| 25   | G       | 85.3           | 10.7          | 92.6        | 18.1          | 91.6        | 11.3          | 83.9        | 14.4          | 77.5        | 21.1          | 3.84         | 297     | 99.7  |
| 26   | C       | 96.7           | 14.6          | 97.6        | 16            | 97.4        | 11.3          | 95.4        | 15.5          | 95.9        | 15.7          | 3.84         | 295     | 98.7  |
| 27   | N       | 95.8           | 13.5          | 97.3        | 11.4          | 95.6        | 9.4           | 94.2        | 12.9          | 95.6        | 13.3          | 3.73         | 10      | 3.3   |
| 28   | C       | 96.5           | 7             | 96.9        | 6.4           | 96.2        | 5.7           | 95.7        | 8.1           | 96.7        | 6             | 3.84         | 300     | 100.0 |
| 29   | G       | 82.5           | 23            | 87          | 28.4          | 87.8        | 11.4          | 73.4        | 16.3          | 74.9        | 23.3          | 3.84         | 294     | 98.0  |
| 30   | V       | 92.6           | 4.8           |             |               |             |               | 93.5        | 4.2           | 85.8        | 4.4           | 3.84         | 17      | 5.7   |
| 31   | L       | 86.5           | 4.6           |             |               | 93.6        | 3.7           |             |               | 79.3        | 4.7           | 3.84         | 5       | 1.7   |
| 32   | G       | 82.1           | 35.6          | 93          | 27.3          | 89.2        | 18.2          | 69          | 20.2          | 60.1        | 41.3          | 3.84         | 291     | 97.0  |
| 33   | R       | 91.4           | 6.1           | 93.7        | 11            | 93          | 3.4           | 91.5        | 5.7           |             |               | 3.84         | 61      | 20.3  |
| 34   | G       | 88.5           | 23.5          | 90.4        | 22.6          | 91.9        | 17.5          | 80.3        | 23.3          | 89          | 28.1          | 3.42         | 278     | 92.7  |

|    |   |      |      |      |      |      |      |      |      |                   |      |      |     |       |
|----|---|------|------|------|------|------|------|------|------|-------------------|------|------|-----|-------|
| 36 | P | 91.7 | 13.2 | 93.5 | 14.7 | 89.8 | 8.9  | 92.6 | 4.2  | 91.2              | 20.6 | 3.42 | 290 | 96.7  |
| 37 | K | 89.7 | 8    | 94.2 | 7.2  | 92.4 | 6.1  |      |      | 93.3              | 8.4  | 3.42 | 77  | 25.7  |
| 38 | D |      |      |      |      |      |      | 96   | 4.3  |                   |      | 1.38 | 299 | 99.7  |
| 39 | A | 88.7 | 13.1 | 88.3 | 7.7  | 94   | 18.5 | 83.3 | 12   | 89.8              | 8.6  | 1.38 | 120 | 40.0  |
| 40 | T |      |      |      |      | 93.8 | 3.3  |      |      |                   |      | 1.38 | 140 | 46.7  |
| 41 | D |      |      |      |      |      |      |      |      | 93.8              | 3.6  | 1.38 | 298 | 99.3  |
| 42 | R |      |      | 90.8 | 4.1  | 88.6 | 6.8  |      |      |                   |      | 1.38 | 169 | 56.3  |
| 43 | C | 95.9 | 14.4 | 97.7 | 16.3 | 92.3 | 9.1  | 94.8 | 13   | 97.6              | 13.7 | 1.65 | 300 | 100.0 |
| 44 | C | 96.8 | 12.1 | 97   | 9.1  | 97   | 14.3 | 96   | 10   | 97.3              | 13.3 | 1.65 | 300 | 100.0 |
| 45 | Y | 92.4 | 8.1  | 94.1 | 4.4  | 92.9 | 10.9 | 89.7 | 4.7  |                   |      | 1.65 | 12  | 4.0   |
| 46 | V | 92.6 | 7.8  | 93.4 | 4.8  | 92.2 | 4.1  | 93.6 | 5.3  | 94.3              | 7.3  | 1.65 | 81  | 27.0  |
| 47 | H | 95.5 | 3.2  | 97.1 | 3.8  | 95.8 | 3.3  | 94.5 | 3    |                   |      | 1.65 | 298 | 99.3  |
| 48 | K | 95.1 | 14.5 | 94.7 | 13.8 | 94.9 | 11.4 | 96.3 | 15.3 | 94.5              | 11.9 | 1.65 | 7   | 2.3   |
| 49 | C | 94.7 | 11.8 | 96   | 11.6 | 94.5 | 9    | 96.3 | 12.6 | 93.6              | 5.8  | 0.86 | 175 | 58.3  |
| 50 | C | 95   | 31.9 | 97.2 | 36   | 96.2 | 14.9 | 94.2 | 20.5 | 92.8              | 10.4 | 0.86 | 300 | 100.0 |
| 51 | Y | 94.3 | 13.8 | 95.2 | 13.5 | 95.5 | 15.1 | 95.1 | 11.5 | 88.9              | 6.1  | 0.86 | 286 | 95.3  |
| 54 | L | 88.7 | 4.6  |      |      | 88.6 | 6.5  |      |      | 87.6              | 3.6  | 2.25 | 118 | 39.3  |
| 55 | T |      |      |      |      | 90.6 | 3.6  |      |      |                   |      | 2.25 | 30  | 10.2  |
| 57 | C | 91.8 | 8.9  | 94   | 10.7 | 93.2 | 8.6  | 85.9 | 6.6  | 90.2              | 4.7  |      | 295 | 98.3  |
| 58 | N | 85.4 | 5.8  |      |      |      |      | 83.8 | 4.8  | 88.9              | 7.8  | 2.25 | 70  | 23.6  |
| 59 | P | 90.1 | 10.2 |      |      | 94.1 | 11.7 | 89.5 | 8.9  | 90.6              | 16.2 | 2.25 | 191 | 64.1  |
| 60 | K |      |      |      |      |      |      |      |      | 70.2 <sup>a</sup> | 4.4  | 2.25 | 127 | 42.5  |
| 61 | K |      |      |      |      | 90.9 | 7.1  |      |      |                   |      |      | 8   | 2.7   |
| 62 | D | 92   | 5.6  | 93.9 | 4.4  | 94.1 | 3.9  | 92.3 | 3.3  | 88.6              | 4.1  | 2.42 | 61  | 20.5  |
| 63 | R | 83.9 | 3.9  |      |      |      |      | 90.1 | 3.7  | 81.2              | 4.6  | 2.42 | 36  | 12.1  |
| 64 | Y | 94.6 | 6.4  | 95.3 | 5.6  | 95.6 | 3.3  | 93.5 | 8.1  | 89.5              | 6.1  | 2.42 | 281 | 94.3  |
| 65 | S | 85.7 | 9.6  |      |      | 87.1 | 7    | 86.4 | 6.7  | 76.6              | 7.8  | 2.42 | 89  | 29.9  |
| 66 | Y | 94.3 | 6.8  | 94.4 | 6.4  | 95.5 | 7.4  | 92.6 | 5.3  | 93.8              | 8.4  | 2.42 | 143 | 48.0  |
| 67 | S | 84.7 | 3.5  |      |      | 93   | 4.4  | 85.6 | 7.2  |                   |      | 2.42 | 116 | 39.1  |
| 68 | W | 94.6 | 13.4 | 95.1 | 10   | 96.4 | 8.9  | 92.6 | 9.7  | 92.6              | 12   | 2.42 | 17  | 5.7   |
| 71 | K | 91.4 | 11.1 | 93.3 | 10.4 | 94   | 9.6  | 89.6 | 5.8  | 92.3              | 8.9  | 2.42 | 38  | 12.9  |
| 72 | T | 92.4 | 6.1  |      |      |      |      | 91   | 3.7  | 90.9              | 7    | 2.51 | 62  | 21.0  |
| 73 | I | 92.9 | 6.9  |      |      | 93.2 | 6.7  | 93   | 5.3  | 88.9              | 11.6 | 2.51 | 146 | 49.0  |
| 74 | V | 89.1 | 4    | 92.6 | 4.9  |      |      | 86.8 | 5.9  |                   |      | 2.51 | 55  | 18.5  |
| 75 | C | 93.6 | 17.5 | 98.1 | 16   | 97.4 | 25.4 | 83   | 2.8  | 93                | 11.7 | 2.51 | 296 | 99.7  |
| 76 | G | 75.6 | 19.2 | 85.7 | 28.8 | 80.8 | 11   |      |      |                   |      | 2.51 | 80  | 26.8  |

|     |   |      |      |      |      |      |      |      |      |                 |      |      |     |       |
|-----|---|------|------|------|------|------|------|------|------|-----------------|------|------|-----|-------|
| 79  | N | 86.3 | 4.6  |      |      | 89.6 | 4.2  |      |      |                 |      | 1.77 | 65  | 21.8  |
| 81  | C | 92   | 14.1 | 93.3 | 13.3 | 94.7 | 13.2 | 93   | 16.7 | 84              | 9.2  | 2.51 | 292 | 98.0  |
| 82  | L | 90   | 4.1  | 92.1 | 3.5  |      |      |      |      |                 |      | 2.51 | 12  | 4.1   |
| 83  | K | 83.5 | 6.1  | 93.4 | 9.1  |      |      | 88.9 | 8.6  | 88.3            | 8.4  | 2.51 | 81  | 27.3  |
| 85  | L | 91.7 | 4.7  | 95.6 | 4.1  |      |      | 90.8 | 5.3  | 88 <sup>a</sup> | 3.9  | 2.52 | 87  | 29.3  |
| 86  | C | 93.3 | 15.5 | 97.2 | 16.6 | 95.6 | 15.9 | 87.4 | 10   | 91.1            | 13.1 | 2.52 | 297 | 100.0 |
| 87  | E | 94   | 6    |      |      | 95.2 | 5.4  | 91.3 | 5.4  | 90.4            | 6.9  | 2.52 | 151 | 50.8  |
| 88  | C | 96.3 | 17.2 | 97.7 | 12.5 | 97.3 | 17.1 | 96.8 | 12.3 | 92.8            | 16.9 | 2.52 | 296 | 99.7  |
| 90  | K | 92.5 | 6.2  | 93.7 | 9.4  | 93.3 | 3.7  | 93.7 | 8.6  |                 |      | 2.52 | 107 | 36.0  |
| 91  | A | 89.1 | 16.2 | 94.9 | 10.6 | 82.2 | 5.2  | 92.7 | 12.1 | 86.5            | 12.2 | 2.52 | 78  | 26.4  |
| 92  | V |      |      |      |      |      |      | 92.3 | 3.1  | 92.8            | 3.9  | 2.52 | 32  | 10.8  |
| 93  | A | 93.4 | 15.4 | 95.2 | 5.3  | 95   | 13   | 90.8 | 13.2 | 87.1            | 14.9 | 2.52 | 248 | 84.1  |
| 94  | I | 93.2 | 5    | 95.8 | 3.7  |      |      | 94.5 | 4.4  | 89.3            | 4.7  | 2.52 | 53  | 18.0  |
| 95  | C | 95.6 | 13.4 | 96.1 | 14.4 | 96.1 | 8.2  | 97   | 14   | 97.8            | 21   | 2.52 | 295 | 100.0 |
| 96  | L | 94   | 6.4  | 93.9 | 4.6  | 92.9 | 10.6 | 94.5 | 6.9  | 95.4            | 4.7  | 2.52 | 82  | 27.9  |
| 97  | R | 89.9 | 4.9  | 94.9 | 6.9  | 91.7 | 5.6  | 86.7 | 6.2  |                 |      | 2.52 | 64  | 22.1  |
| 98  | E |      |      | 95.2 | 3.1  | 87.4 | 3.7  |      |      |                 |      | 2.37 | 27  | 9.9   |
| 99  | N |      |      |      |      | 91.9 | 3.5  | 95.4 | 3.1  |                 |      | 2.37 | 97  | 38.8  |
| 100 | L |      |      | 93.8 | 3.6  |      |      | 89.3 | 3.1  |                 |      | 2.37 | 79  | 56.0  |
| 102 | T | 91.1 | 4.9  | 92.6 | 5.1  | 89.8 | 8.8  |      |      | 92.8            | 3.5  | 2.37 | 108 | 45.4  |
| 103 | Y | 94.9 | 6    | 96.1 | 6.5  | 93.7 | 3.6  | 95.8 | 6.2  | 94.2            | 4.5  | 2.37 | 216 | 91.1  |
| 104 | N |      |      |      |      | 93.6 | 4.2  | 94.8 | 3.9  |                 |      | 2.37 | 135 | 57.2  |
| 105 | K |      |      | 93   | 8.8  |      |      |      |      |                 |      | 2.37 | 85  | 36.3  |
| 106 | K |      |      | 88.5 | 8    |      |      |      |      |                 |      | 2.85 | 91  | 39.7  |
| 107 | Y | 87.4 | 4.9  | 91.7 | 6.4  |      |      |      |      | 94.4            | 7    | 2.85 | 150 | 67.0  |
| 108 | K |      |      | 78.1 | 5.3  |      |      |      |      |                 |      | 2.85 | 63  | 30.9  |
| 111 | Y |      |      | 85.4 | 4    |      |      |      |      |                 |      | 3.09 | 5   | 4.0   |
| 114 | P |      |      |      |      |      |      | 73.5 | 8.6  | 76.3            | 7.8  | 3.09 | 17  | 14.4  |
| 115 | F |      |      | 89.1 | 6.8  |      |      |      |      | 89.4            | 5.6  | 3.09 | 10  | 8.8   |
| 117 | D |      |      |      |      |      |      | 87.0 | 3.3  |                 |      |      | 3   | 3.9   |
| 116 | C | 95.3 | 14.1 | 97.1 | 16.6 | 96.4 | 15   | 94.8 | 12.8 | 95.4            | 16.3 | 3.09 | 109 | 99.1  |
| 118 | K | 94.8 | 9.4  | 96.1 | 10.2 | 96.3 | 8.7  | 91.3 | 6    | 95.4            | 9    | 1.3  | 11  | 20.8  |
| 119 | A | 80.8 | 7.7  | 81.6 | 10.6 | 85.6 | 4.8  | 69.6 | 4.7  | 89.5            | 9    | 1.3  | 7   | 15.6  |
| 122 | C | 89.7 | 16.1 | 94   | 21.9 | 84.7 | 12.3 | 93.8 | 14.9 | 91.2            | 16.9 | 1.3  | 16  | 94.1  |

Res# stands for residue number; ResType for residues type; Cryst for crystallography, mon for monomer, RSCC for real-space correlation coefficient;  $\Delta$ Con for contrast difference within other RSCC; MS for mass spectrometry. RSCC numbers with  $^{\alpha}$  refers to RSCC of main-chain being between 70 and 80, and  $^{\beta}$  refers to values below 70.

Supplementary Table 13: Residues of MjTX-I having assignment ambiguity from crystallographic data being resolved by mass spectrometry

| Res# | ResType | Cryst mon ABCD |              | Cryst mon A |              | Cryst mon B |              | Cryst mon C |              | Cryst mon D |              | MS        | ConSurf |      |
|------|---------|----------------|--------------|-------------|--------------|-------------|--------------|-------------|--------------|-------------|--------------|-----------|---------|------|
|      |         | RSCC           | $\Delta$ Con | RSCC        | $\Delta$ Con | RSCC        | $\Delta$ Con | RSCC        | $\Delta$ Con | RSCC        | $\Delta$ Con | PrimScore | #Struct | %    |
| 1    | S!      |                |              |             |              |             |              |             |              | 75.9        | 2.4          | 3.49      | 40      | 100  |
| 1    | MainCh  |                |              |             |              |             |              |             |              | 90.8        |              |           |         |      |
| 2    | L!      |                |              |             |              | 92.5        | 2.2          |             |              | 89.6        | 1.5          | 3.49      | 114     | 78.1 |
| 2    | MainCh  |                |              |             |              | 95.7        |              |             |              | 90.9        |              |           |         |      |
| 3    | V!      |                |              | 85.1        | 1.5          | 94.4        | 0.1          |             |              |             |              | 3.49      | 25      | 14.5 |
| 3    | MainCh  |                |              | 94.8        |              | 95.5        |              |             |              |             |              |           |         |      |
| 4    | E!      | 92.7           | 2            | 92.9        | 6.8          | 95.4        | 0.6          | 95.3        | 2            | 83.9        | 0.7          | 3.49      | 47      | 25   |
| 4    | Q       | 90.7           | 5.6          | 93.2        | 0.3          | 94.8        | 5.3          | 93.3        | 4.5          | 81          | 0.5          | 1.25      | 90      | 47.9 |
| 4    | MainCh  | 93.8           |              | 95          |              | 95.4        |              | 92.4        |              | 92          |              |           |         |      |
| 7    | S       | 81.9           | 1.3          | 82.1        | 1            |             |              | 81.5        | 4.4          | 76          | 2.9          |           | 27      | 12.7 |
| 7    | K!      | 73.9           | 1.4          | 89.8        | 1.8          |             |              | 63.4*       | 1.2          | n/a*        | n/a          | 3.49      | 63      | 29.6 |
| 7    | MainCh  | 92.1           |              | 92.4        |              |             |              | 89.2        |              | 89          |              |           |         |      |
| 8    | M!      |                |              | 96.2        | 2.8          | 97          | 0.1          |             |              |             |              | 3.49      | 171     | 79.5 |
| 8    | MainCh  |                |              | 94.2        |              | 97.5        |              | 91.3        |              |             |              |           |         |      |
| 9    | I!      |                |              | 94          | 0.5          | 94.3        | 2.7          |             |              |             |              | 3.49      | 161     | 74.2 |
| 9    | MainCh  |                |              | 95.8        |              | 94.9        |              | 93          |              |             |              |           |         |      |
| 10   | L!      |                |              |             |              |             |              | 83.2        | 2.3          |             |              | 3.49      | 11      | 5    |
| 10   | MainCh  |                |              | 95.5        |              | 93.8        |              | 92.5        |              |             |              |           |         |      |
| 11   | Q!      |                |              | 94.3        | 0            | 92.5        | 2.6          | 89.3        | 1.6          |             |              | 3.49      | 24      | 11   |
| 11   | E       |                |              | 94.3        | 4.8          | 88.9        | 3.6          | 87.7        | 3.3          |             |              | 1.27      | 10      | 4.6  |

|    |        |      |     |      |      |      |     |      |     |      |      |      |      |      |
|----|--------|------|-----|------|------|------|-----|------|-----|------|------|------|------|------|
| 11 | MainCh |      |     | 95.7 |      | 94.1 |     | 94   |     |      |      |      |      |      |
| 12 | E!     |      |     | 94.1 | 0.8  | 96   | 2.5 |      |     |      | 3.49 | 9    | 4    |      |
| 12 | Q      |      |     | 93.3 | 3.9  | 93.5 | 3   |      |     |      |      | 0    | 0    |      |
| 12 | MainCh |      |     | 93.5 |      | 94   |     | 93.4 |     |      |      |      |      |      |
| 15 | K!     | 84.9 | 0.7 | 83.1 | 1.3  |      |     | 89.1 | 2.5 |      | 3.49 | 102  | 36.8 |      |
| 15 | MainCh | 93.5 |     | 93.6 |      |      |     | 92.8 |     |      |      |      |      |      |
| 18 | A      | 78   | 0.9 | 83.1 | 1.2  | 89.2 | 5.7 | 67.9 | 2.4 | 78.4 | 2    | 2.6  | 10   | 5.3  |
| 18 | V!     | 77.1 | 2.9 | 86.1 | 0.1  | 83.5 | 4.2 | 71.6 | 0   | 76.4 | 3.3  | 3.84 | 29   | 15.4 |
| 18 | T      | 74.2 | 0.6 | 86   | 1.1  | 76.8 | 3.5 | 71.6 | 0   | 73.1 | 2.2  | 2.19 | 8    | 4.3  |
| 18 | I      | 72.9 | 0.5 | 81.9 | 4.2  | 73.3 | 3.5 | 74.5 | 2.9 | 70.3 | 0.9  | 2.44 | 35   | 18.6 |
| 18 | MainCh | 90.8 |     | 92.5 |      | 94.5 |     | 89.1 |     | 88   |      |      |      |      |
| 19 | V      | 80.3 | 0.2 | 77.9 | 0.5  | 87.1 | 1.1 | 85.8 | 0.9 | 77.5 | 3.1  |      | 11   | 3.8  |
| 19 | T!     | 80.1 | 0.6 | 80.7 | 2.8  | 86   | 0.8 | 84.9 | 1.7 | 79.8 | 2.3  | 3.84 | 19   | 6.5  |
| 19 | S      | 79.5 | 0.6 | 83.7 | 3    | 81.7 | 2   | 80.9 | 2.5 | 83.7 | 3.9  | 1.24 | 11   | 3.8  |
| 19 | I      | 78.9 | 4.4 | 86.2 | 2.5  | 84   | 2.3 | 83.2 | 2.3 | 74.4 | 1.3  |      | 10   | 3.4  |
| 19 | K      | 61.8 | 1.8 | 65.4 | 0.6  | 66.3 | 6.7 | 66.7 | 0.8 | 70.7 | 5.6  | 2.6  | 11   | 3.8  |
| 19 | MainCh | 82.7 |     | 90.9 |      | 77.1 |     | 82.3 |     | 87.2 |      |      |      |      |
| 30 | V!     |      |     | 95.6 | 1.4  | 91.8 | 6.1 |      |     |      |      | 3.84 | 17   | 5.7  |
| 30 | T      |      |     | 94.2 | 5.9  | 91.9 | 0.1 |      |     |      |      | 1.51 | 4    | 1.3  |
| 30 | MainCh |      |     | 94.4 |      | 95.7 |     |      |     |      |      |      |      |      |
| 31 | L!     |      |     | 88   | 1.2  |      |     | 84.2 | 1.9 |      |      | 3.84 | 5    | 1.7  |
| 31 | N      |      |     | 86.8 | 0.4  |      |     | 82.3 | 5.9 |      |      |      | 1    | 0.3  |
| 31 | D      |      |     | 86.4 | 5.8  |      |     | 70.8 | 1   |      |      | 1.51 | 2    | 0.7  |
| 31 | MainCh |      |     | 95.7 |      |      |     | 91   |     |      |      |      |      |      |
| 33 | R!     |      |     |      |      |      |     |      |     | 87.3 | 0.8  | 3.84 | 61   | 20.3 |
| 33 | MainCh |      |     |      |      |      |     |      |     | 92.2 |      |      |      |      |
| 35 | A      | 83.5 | 2.4 | 91   | 12.5 | 82.6 | 2.1 | 79.9 | 0.4 | 79.6 | 1    |      | 4    | 1.3  |
| 35 | S      | 81.1 | 7.6 | 75.3 | 3.3  | 86.9 | 3.8 | 79.5 | 5.8 | 82.6 | 3    |      | 15   | 5    |

|           |        |      |      |      |     |      |     |      |     |      |     |      |     |      |
|-----------|--------|------|------|------|-----|------|-----|------|-----|------|-----|------|-----|------|
| 35        | K!     | 65.1 | 0.5  | 76.7 | 1.4 | 83.1 | 0.5 | 73.7 | 1.2 | n/a  | n/a | 3.42 | 28  | 9.3  |
| 35        | MainCh | 92.2 |      | 94.5 |     | 90.8 |     | 94.7 |     | 90.4 |     |      |     |      |
| 37        | K!     |      |      |      |     |      |     | 81.6 | 0.6 |      |     | 3.42 | 77  | 25.7 |
| 37        | MainCh |      |      |      |     |      |     | 86.6 |     |      |     |      |     |      |
| <b>38</b> | D!     | 95.6 | 2.2  | 96.4 | 1.4 | 95   | 1.7 |      |     | 97.3 | 1.4 | 1.38 | 299 | 99.7 |
| <b>38</b> | N      | 93.4 | 11.4 | 95   | 9.4 | 93.3 | 7.4 |      |     | 95.9 | 9.1 |      | 0   | 0    |
| <b>38</b> | L      | 82   | 1.3  | 85.6 | 2.1 | 81.5 | 0.4 |      |     | 86.8 | 6.6 |      | 0   | 0    |
| <b>38</b> | MainCh | 95.2 |      | 94.4 |     | 97.3 |     |      |     | 97.9 |     |      |     |      |
| <b>40</b> | T!     | 94.7 | 2.8  | 95.9 | 2.8 |      |     | 93.7 | 2.7 | 94.5 | 0.7 | 1.38 | 140 | 46.7 |
| <b>40</b> | V      | 91.9 | 6.5  | 93.1 | 7.8 |      |     | 91   | 5.1 | 93.8 | 9.5 |      | 26  | 8.7  |
| <b>40</b> | MainCh | 94.2 |      | 95.6 |     |      |     | 93.8 |     | 93.7 |     |      |     |      |
| <b>41</b> | D!     | 94.8 | 1.1  | 96.3 | 0.5 | 94.8 | 1.1 | 93.9 | 2.9 |      |     | 1.38 | 298 | 99.3 |
| <b>41</b> | N      | 93.7 | 3.7  | 95.8 | 4   | 93.7 | 1.5 | 91   | 3   |      |     |      | 0   | 0    |
| <b>41</b> | L      | 90   | 0.1  | 91.8 | 0.2 | 92.2 | 2.2 | 88   | 0.6 |      |     |      | 0   | 0    |
| <b>41</b> | MainCh | 93.9 |      | 96.3 |     | 94.3 |     | 92.2 |     |      |     |      |     |      |
| 42        | R!     | 86.2 | 2.7  |      |     |      |     | 88   | 1.5 | 84.4 | 0.9 | 1.38 | 169 | 56.3 |
| 42        | MainCh | 94   |      |      |     |      |     | 91.8 |     | 95.2 |     |      |     |      |
| 45        | Y!     |      |      |      |     |      |     |      |     | 91.1 | 2.6 | 1.65 | 12  | 4    |
| 45        | MainCh |      |      |      |     |      |     |      |     | 93   |     |      |     |      |
| 47        | H!     |      |      |      |     |      |     |      |     | 94   | 2.9 | 1.65 | 298 | 99.3 |
| 47        | MainCh |      |      |      |     |      |     |      |     | 91.9 |     |      |     |      |
| 53        | T      | 74.6 | 0.6  | 71.1 | 2.2 | 83.3 | 2.7 | 67.2 | 0.3 | 79.6 | 1.2 |      | 5   | 1.7  |
| 53        | K!     | 74   | 0.8  | 79.8 | 3   | 76.1 | 1.5 | 76.7 | 1.1 | 76.5 | 1.1 | 2.25 | 79  | 26.3 |
| 53        | V      | 73.2 | 0.2  | 68.9 | 0.4 | 80.6 | 1.5 | 64.7 | 1.2 | 82   | 2.4 |      | 4   | 1.3  |
| 53        | A      | 73   | 1.5  | 82.4 | 2.6 | 74.6 | 1.3 | 69.4 | 0.1 | 73.5 | 6   | 0.86 | 19  | 6.3  |
| 53        | MainCh | 86.7 |      | 91.6 |     | 86.7 |     | 85.1 |     | 84.7 |     |      |     |      |
| 54        | L!     |      |      | 88.6 | 0.9 |      |     | 87.6 | 2.2 |      |     | 2.25 | 118 | 39.3 |

|    |        |      |     |      |     |      |     |      |      |      |     |      |          |
|----|--------|------|-----|------|-----|------|-----|------|------|------|-----|------|----------|
| 54 | N      |      |     | 89   | 0.4 |      |     | 83.5 | 0.3  |      |     | 0    | 0        |
| 54 | D      |      |     | 87.7 | 5.9 |      |     | 83.2 | 1.2  |      |     | 0    | 0        |
| 54 | MainCh |      |     | 93.6 |     |      |     | 89.5 |      |      |     |      |          |
| 55 | V      | 79.9 | 1.3 | 87.1 | 1.1 |      |     | 81.3 | 0.1  | 66.4 | 0.7 | 7    | 2.4      |
| 55 | T!     | 78.6 | 0.4 | 88.6 | 1.5 |      |     | 78.7 | 12.3 | 58.5 | 0.7 | 2.25 | 30 10.2  |
| 55 | S      | 78.2 | 2.2 | 86   | 4.6 |      |     | 81.7 | 0.4  | 64.7 | 0.1 |      | 14 4.7   |
| 55 | I      | 73.5 | 5.3 | 79.1 | 0.3 |      |     | 64.3 | 0.1  | 72.6 | 5   |      | 10 3.4   |
| 55 | MainCh | 86.4 |     | 90.5 |     |      |     | 70.7 |      | 86.7 |     |      |          |
| 56 | D!     | 69.8 | 0.4 | 83.6 | 0.3 | 76.2 | 0.7 | 54*  | 3.5  | 73.2 | 3.6 | 2.25 | 27 9.2   |
| 56 | N      | 69.4 | 0.5 | 86.4 | 2.8 | 87.2 | 8   | 54.5 | 0.5  | 80.7 | 7.5 |      | 11 3.7   |
| 56 | L      | 68.9 | 6.7 | 83.3 | 6.8 | 79.2 | 0.7 | 47.3 | 0.1  | 69   | 2.4 |      | 0 0      |
| 56 | MainCh | 85.5 |     | 92.6 |     | 91.8 |     | 72.8 |      | 77.1 |     |      |          |
| 58 | N!     |      |     | 92   | 0.2 | 92   | 0.2 |      |      |      |     | 2.25 | 70 23.6  |
| 58 | L      |      |     | 90   | 8.3 | 90   | 8.3 |      |      |      |     |      | 22 7.4   |
| 58 | D      |      |     | 91.8 | 1.8 | 91.8 | 1.8 |      |      |      |     | 1.29 | 31 10.4  |
| 58 | MainCh |      |     | 93.5 |     | 92.1 |     |      |      |      |     |      |          |
| 59 | P!     |      |     | 88.1 | 2.5 |      |     |      |      |      |     | 2.25 | 191 64.1 |
| 59 | MainCh |      |     | 89.1 |     |      |     |      |      |      |     |      |          |
| 60 | K!     | 68.7 | 0.2 | 87   | 2.7 | 76.8 | 4   | n/a* | n/a  |      |     | 2.25 | 127 42.5 |
| 60 | A      | 68.5 | 0.9 | 81.5 | 2.6 | 80.9 | 4.1 | 61.9 | 9.9  |      |     |      | 1 0.3    |
| 60 | G      | 67.6 | 3.9 | 69.2 | 1.8 | 71.6 | 0.3 | 67.5 | 5.6  |      |     |      | 0 0      |
| 60 | MainCh | 86.7 |     | 87.8 |     | 93.1 |     | 85.1 |      | 76.5 |     |      |          |
| 63 | R!     |      |     | 81.1 | 0.1 | 87.9 | 1.1 |      |      |      |     | 2.42 | 36 12.1  |
| 63 | K      |      |     | 78.6 | 2.7 | 88.7 | 0.4 |      |      |      |     |      | 17 5.7   |
| 63 | MainCh |      |     | 89.9 |     | 94.7 |     |      |      |      |     |      |          |
| 65 | S!     |      |     | 88.7 | 2.4 |      |     |      |      |      |     | 2.42 | 89 29.9  |
| 65 | MainCh |      |     | 95.9 |     |      |     |      |      |      |     |      |          |
| 67 | S!     |      |     | 87   | 1.6 |      |     |      |      | 82*  | 5.1 | 2.42 | 116 39.1 |

|    |        |      |     |       |     |       |     |       |     |       |     |      |     |      |
|----|--------|------|-----|-------|-----|-------|-----|-------|-----|-------|-----|------|-----|------|
| 67 | A      |      |     | 87    | 0   |       |     |       |     | 85.8  | 3.8 |      | 5   | 1.7  |
| 67 | MainCh |      |     | 90.3  |     |       |     |       |     | 78.7  |     |      |     |      |
| 69 | A      | 75.4 | 3.1 | 84.5  | 0.5 | 81.4  | 3.8 | 80.9  | 1.9 | 56.8  | 1.2 |      | 9   | 3.1  |
| 69 | S      | 72.3 | 3.6 | 84    | 4.9 | 82.7  | 0   | 74.3  | 0.6 | 58.9  | 0.4 |      | 79  | 27   |
| 69 | L      | 68.7 | 2.5 | 78.3  | 2.7 | 82.7  | 1.3 | 79    | 3.5 | 50.8  | 0   | 0.98 | 7   | 2.4  |
| 69 | K!     | 62.5 | 2.1 | 75.6* | 3.3 | 70.1* | 3.1 | 68.5* | 2.6 | 53.7* | 0.4 | 2.42 | 22  | 7.5  |
| 69 | MainCh | 92.2 |     | 93.8  |     | 94.3  |     | 92.6  |     | 87.4  |     |      |     |      |
| 70 | N!     | 84.4 | 5.8 | 86.7  | 0.6 | 92.5  | 0.8 | 77.4  | 0.2 | 74    | 0.4 |      | 96  | 32.5 |
| 70 | L      | 78.6 | 0.3 | 85.1  | 4.1 | 89.7  | 0.8 | 74.2  | 3.2 | 62.2  | 0.1 |      | 0   | 0    |
| 70 | D      | 78.3 | 1.8 | 86.1  | 1   | 91.7  | 1.9 | 71    | 1.7 | 60.9  | 0.1 | 2.42 | 44  | 14.9 |
| 70 | MainCh | 92.8 |     | 95.9  |     | 96.2  |     | 88    |     | 85.5  |     |      |     |      |
| 72 | T!     |      |     | 94.2  | 2.7 | 93.6  | 2.5 |       |     |       |     | 2.51 | 62  | 21   |
| 72 | V      |      |     | 91.5  | 2.8 | 91.1  | 5.4 |       |     |       |     |      | 15  | 5.1  |
| 72 | MainCh |      |     | 94.9  |     | 95.5  |     |       |     |       |     |      |     |      |
| 73 | !      |      |     | 92.3  | 1.8 |       |     |       |     |       |     | 2.51 | 146 | 49   |
| 73 | MainCh |      |     | 95.8  |     |       |     |       |     |       |     |      |     |      |
| 74 | V!     |      |     |       |     | 93.8  | 2.2 |       |     | 78.5  | 8.2 | 2.51 | 55  | 18.5 |
| 74 | T      |      |     |       |     | 91.6  | 4.8 |       |     | 79.5  | 1   | 1.27 | 107 | 35.9 |
| 74 | MainCh |      |     |       |     | 94.5  |     |       |     | 78.4  |     |      |     |      |
| 76 | G!     |      |     |       |     |       |     | 78.8  | 2.8 | 53.8  | 1.6 | 2.51 | 80  | 26.8 |
| 76 | MainCh |      |     |       |     |       |     | 87.8  |     | 86.2  |     |      |     |      |
| 80 | S      | 61.1 | 3.8 | 67.5  | 2.3 | 68.9  | 0.6 | 55.6  | 2.6 | 75.5  | 7.2 |      | 27  | 9.1  |
| 80 | A!     | 57.3 | 0.7 | 68.1  | 0.6 | 67.6  | 0.4 | n/a   | n/a | 65.1  | 1   | 2.51 | 25  | 8.4  |
| 80 | MainCh | 81.8 |     | 88    |     | 74.2  |     | 80    |     | 86    |     |      |     |      |
| 82 | L!     |      |     |       |     | 95.2  | 2.3 | 91.9  | 1.9 | 78.2  | 0.9 | 2.51 | 12  | 4.1  |
| 82 | S      |      |     |       |     | 89.2  | 2.6 | 90    | 3.3 | 79.1  | 0.9 |      | 4   | 1.4  |
| 82 | N      |      |     |       |     | 92.9  | 0.6 | 86.7  | 0.7 | 77.3  | 0.1 | 1.77 | 0   | 0    |
| 82 | D      |      |     |       |     | 92.3  | 3.1 | 86    | 1.6 | 76.1  | 1.4 | 2.14 | 16  | 5.4  |

|    |        |      |      |      |     |       |     |       |     |      |     |      |     |      |
|----|--------|------|------|------|-----|-------|-----|-------|-----|------|-----|------|-----|------|
| 82 | MainCh |      |      |      |     | 94    |     | 88.1  |     | 76.5 |     |      |     |      |
| 83 | K!     |      |      |      |     | 68.1* | 0   |       |     |      |     | 2.51 | 81  | 27.3 |
| 83 | A      | 77.4 | 2.6  | 78.9 | 0.5 | 80.6  | 0.3 | 75.9  | 3.2 | 75.2 | 0.8 |      | 42  | 14.1 |
| 83 | MainCh | 90.8 |      | 94.8 |     | 91.4  |     | 89.7  |     | 81.3 |     |      |     |      |
| 84 | E!     | 67.7 | 1.9  | 87.4 | 1.5 | 75.8  | 0.4 | 53.2* | 4.1 | 77   | 0.3 | 2.52 | 24  | 8.1  |
| 84 | Q      | 65.7 | 3.2  | 89.5 | 2.1 | 75.4  | 3.2 | 56.4  | 0.9 | 83.3 | 5.9 | 1.49 | 75  | 25.3 |
| 84 | MainCh | 90.4 |      | 94.8 |     | 89.9  |     | 88.4  |     | 85.8 |     |      |     |      |
| 85 | L!     |      |      |      |     | 95.4  | 2.5 |       |     |      |     | 2.52 | 87  | 29.3 |
| 85 | D      |      |      |      |     | 92.9  | 0.4 |       |     |      |     |      | 0   | 0    |
| 85 | N      |      |      |      |     | 92.5  | 8.2 |       |     |      |     |      | 2   | 0.7  |
| 85 | MainCh |      |      |      |     | 95.8  |     |       |     |      |     |      |     |      |
| 87 | E!     |      |      | 96.8 | 2.3 |       |     |       |     |      |     | 2.52 | 151 | 50.8 |
| 87 | Q      |      |      | 94.5 | 3.2 |       |     |       |     |      |     |      | 18  | 6.1  |
| 87 | MainCh |      |      | 96.9 |     |       |     |       |     |      |     |      |     |      |
| 89 | D!     | 93.7 | 2.6  | 94.8 | 0.8 | 95.4  | 2.1 | 94    | 1.8 | 87.5 | 1.9 | 2.52 | 294 | 99   |
| 89 | N      | 91.1 | 6.8  | 94   | 2.3 | 93.3  | 4.3 | 92.2  | 9.8 | 85.6 | 3.3 |      | 1   | 0.3  |
| 89 | L      | 84.3 | 3.1  | 87.6 | 3.8 | 83.9  | 1.7 | 82.4  | 1.6 | 82.3 | 2.5 |      | 0   | 0    |
| 89 | MainCh | 93.4 |      | 92.8 |     | 94.8  |     | 94.5  |     | 91.1 |     |      |     |      |
| 90 | K!     |      |      |      |     |       |     |       |     | 92.3 | 1.9 | 2.52 | 107 | 36   |
| 90 | MainCh |      |      |      |     |       |     |       |     | 92.1 |     |      |     |      |
| 92 | V!     | 93.4 | 2.1  | 95.3 | 2   | 93.5  | 5.3 |       |     |      |     | 2.52 | 32  | 10.8 |
| 92 | T      | 91.3 | 11.1 | 93.3 | 7.7 | 94.4  | 0.9 |       |     |      |     |      | 1   | 0.3  |
| 92 | MainCh | 93.7 |      | 93.9 |     | 93.9  |     |       |     |      |     |      |     |      |
| 94 | !!     |      |      |      |     | 92.9  | 1.2 |       |     |      |     | 2.52 | 53  | 18   |
| 94 | MainCh |      |      |      |     | 93.3  |     |       |     |      |     |      |     |      |
| 97 | R!     |      |      |      |     |       |     |       |     | 90   | 0.3 | 2.52 | 64  | 22.1 |
| 97 | MainCh |      |      |      |     |       |     |       |     | 94.3 |     |      |     |      |

|     |        |      |     |      |     |      |     |       |     |      |     |      |     |      |
|-----|--------|------|-----|------|-----|------|-----|-------|-----|------|-----|------|-----|------|
| 98  | E!     | 91.4 | 2.8 |      |     |      |     | 87.2  | 0.4 | 92.8 | 2.1 | 2.37 | 27  | 9.9  |
| 98  | Q      | 88.6 | 2.9 |      |     |      |     | 86.3  | 3.5 | 93   | 0.2 | 2.01 | 23  | 8.4  |
| 98  | MainCh | 93.1 |     |      |     |      |     | 90    |     | 95.3 |     |      |     |      |
| 99  | N!     | 93.3 | 2.7 | 94.5 | 2.4 |      |     |       |     | 93   | 0.1 | 2.37 | 97  | 38.8 |
| 99  | D      | 90.6 | 0.2 | 91   | 4.1 |      |     |       |     | 92.9 | 1.9 | 2.01 | 0   | 0    |
| 99  | L      | 90.4 | 5.6 | 92.1 | 1.1 |      |     |       |     | 94.1 | 1.1 |      | 0   | 0    |
| 99  | MainCh | 95.2 |     | 96.7 |     |      |     |       |     | 95.1 |     |      |     |      |
| 100 | L!     | 90.8 | 2.1 |      |     | 88.2 | 0.9 |       |     | 93.6 | 0.3 | 2.37 | 79  | 56   |
| 100 | N      | 88.7 | 0.6 |      |     | 87.1 | 4.5 |       |     | 93.3 | 0.3 | 1.75 | 4   | 2.8  |
| 100 | D      | 88.1 | 4   |      |     | 87.3 | 0.2 |       |     | 93   | 7.7 |      | 2   | 1.4  |
| 100 | MainCh | 92.1 |     |      |     | 93.2 |     |       |     | 91.8 |     |      |     |      |
| 101 | S      | 74.8 | 1.5 | 75.7 | 0.9 | 67.4 | 2.2 | 79.8  | 0.3 | 83.8 | 3.4 |      | 8   | 5.7  |
| 101 | N      | 73.3 | 0.6 | 84.1 | 0.5 | 79   | 1.6 | 67.9  | 1   | 79   | 0.8 | 1.95 | 14  | 9.9  |
| 101 | D!     | 72.7 | 0.9 | 83.6 | 6.2 | 76.1 | 1.3 | 66.9  | 1.1 | 77.9 | 0.8 | 2.37 | 27  | 19.1 |
| 101 | MainCh | 79.6 |     | 84.4 |     | 74   |     | 75.7  |     | 89.4 |     |      |     |      |
| 102 | T!     |      |     |      |     |      |     | 94.2  | 2.6 |      |     | 2.37 | 108 | 45.4 |
| 102 | S      |      |     |      |     |      |     | 91.6  | 4.1 |      |     |      | 42  | 17.6 |
| 102 | V      |      |     |      |     |      |     | 87.5  | 0.2 |      |     |      | 2   | 0.8  |
| 102 | MainCh |      |     |      |     |      |     | 89.9  |     |      |     |      |     |      |
| 104 | N!     | 90.9 | 2.7 | 87.8 | 0.3 |      |     |       |     | 90.7 | 2.6 | 2.37 | 135 | 57.2 |
| 104 | D      | 88.2 | 1.3 | 87.5 | 3.5 |      |     |       |     | 88.1 | 0.8 | 2.32 | 22  | 9.3  |
| 104 | L      | 86.9 | 4.1 | 84   | 0.9 |      |     |       |     | 87.3 | 3   |      | 1   | 0.4  |
| 104 | MainCh | 94.1 |     | 90   |     |      |     |       |     | 96.7 |     |      |     |      |
| 105 | S      | 75   | 2.9 |      |     | 77.1 | 1.2 | 69.2  | 1.8 | 68.3 | 2.4 | 1.22 | 13  | 5.6  |
| 105 | A      | 72.1 | 2.3 |      |     | 69   | 0   | 75    | 5.8 | 71.5 | 0.6 | 1.21 | 1   | 0.4  |
| 105 | K!     | 69.8 | 0.2 |      |     | 70.2 | 0.7 | 65.2* | 1.6 | 73.2 | 1.7 | 2.37 | 85  | 36.3 |
| 105 | MainCh | 90.4 |     |      |     | 91.8 |     | 80.1  |     | 93.9 |     |      |     |      |
| 106 | S      | 80.1 | 4   |      |     | 78.4 | 8.9 | 80.9  | 1.1 | 86.5 | 3.3 |      | 18  | 7.9  |

|     |        |      |     |       |     |       |     |       |     |       |      |      |     |      |
|-----|--------|------|-----|-------|-----|-------|-----|-------|-----|-------|------|------|-----|------|
| 106 | K!     | 68.1 | 0.4 |       |     | 64.7* | 0.1 | 70.1* | 0.8 | 72.3* | 2.5  | 2.85 | 91  | 39.7 |
| 106 | MainCh | 90.8 |     |       |     | 91.6  |     | 90.7  |     | 89.9  |      |      |     |      |
| 107 | Y!     |      |     |       |     | 87.2  | 2.2 | 77.4  | 0.6 |       |      | 2.85 | 150 | 67   |
| 107 | K      |      |     |       |     | 87.6  | 0.4 | 87.1  | 1.8 |       |      |      | 1   | 0.4  |
| 107 | R      |      |     |       |     | 89.1  | 1.5 | 87.9  | 0.8 |       |      |      | 0   | 0    |
| 107 | MainCh |      |     |       |     | 90.3  |     | 83.5  |     | 90.8  |      |      |     |      |
| 108 | K!     | 72.5 | 2.7 |       |     | 76.5  | 0.4 | 57.9  | 1.3 | 81.3  | 0.9  | 2.85 | 63  | 30.9 |
| 108 | A      | 69.8 | 0.1 |       |     | 79.9  | 1.7 | 62.1  | 0.6 | 75.4  | 0.1  |      | 9   | 4.4  |
| 108 | MainCh | 83.3 |     |       |     | 89.7  |     | 72.4  |     | 91.3  |      |      |     |      |
| 110 | L      | 71   | 4.3 | 76    | 0.3 | 68.6  | 1.7 | 70.3  | 4.6 | 65.3  | 1.4  | 2.16 | 22  | 16.2 |
| 110 | D      | 66.7 | 2.6 | 80.8  | 4.8 | 66.9  | 1.6 | 65.7  | 4.3 | 51.8  | 1.3  |      | 0   | 0    |
| 110 | N!     | 59.7 | 0.9 | 86    | 5.2 | 69.1  | 0.5 | n/a   | n/a | 50.2  | 0.5  | 3.09 | 3   | 2.2  |
| 110 | G      | 58.8 | 0.7 | 58.9  | 0.6 | 70.7  | 1   | 74    | 3.7 | 75.6  | 10.3 | 1.3  | 0   | 0    |
| 110 | MainCh | 69.4 |     | 73    |     | 62.9  |     | 68.7  |     | 68.2  |      |      |     |      |
| 111 | F      | 62.1 | 0.5 |       |     | n/a   | n/a | 62.5  | 0.3 | 71.6  | 0.3  |      | 14  | 11.1 |
| 111 | Y!     | 61.6 | 0.4 |       |     | n/a   | n/a | 59.7  | 1.6 | 69.9  | 2    | 3.09 | 5   | 4    |
| 111 | H      | 61.2 | 0.4 |       |     | n/a   | n/a | 61.1  | 0.1 | 74.2  | 1.6  |      | 2   | 1.6  |
| 111 | A      | 52.2 |     |       |     | n/a   | n/a | 63.3  | 0.2 | 62.5  | 2.3  |      | 1   | 0.8  |
| 111 | MainCh | 59.6 |     |       |     | 60.2  |     | 75    |     | 42.7  |      |      |     |      |
| 112 | G      | 67.8 | 0.5 | 74    | 2.2 | n/a   | n/a | n/a   | n/a | n/a   | n/a  | 1.3  | 1   | 3    |
| 112 | A      | 67.3 | 0.8 | 67.9  | 0.2 | 68    | 2   | 74.3  | 1.1 | 68.3  | 2.2  |      | 0   | 0    |
| 112 | S      | 65.7 | 1   | 53.9  | 1.4 | 66    | 0.8 | 77    | 2.7 | 78.7  | 2.7  | 2.15 | 7   | 21.2 |
| 112 | L!     | 63.5 | 0.9 | 59.4* | 0.5 | 65.2  | 0.5 | 73.2* | 3.3 | 73.9* | 1.5  | 3.09 | 2   | 6.1  |
| 112 | N      | 62   | 0.4 | 51.8  | 1.5 | 69.7  | 0.7 | 68.8  | 1.9 | 72.2  | 3.9  |      | 1   | 3    |
| 112 | D      | 61.6 | 6.8 | 50.3  | 2.2 | 69    | 1   | 66.9  | 1   | 76    | 2.1  |      | 0   | 0    |
| 112 | MainCh | 67.7 |     | 71.2  |     | 56.2  |     | 82.4  |     | 57    |      |      |     |      |
| 113 | L      | 63.6 | 2.5 | 49.2  | 0.5 | n/a   | n/a | 64.5  | 0.6 | n/a   | n/a  |      | 1   | 0.8  |
| 113 | A      | 61.1 | 1.1 | n/a   | n/a | n/a   | n/a | 68.7  | 4.2 | n/a   | n/a  | 1.3  | 5   | 4.2  |
| 113 | K!     | n/a  | n/a | 48.7* | 0.9 | n/a*  | n/a | n/a*  | n/a | 65.4  |      | 3.09 | 38  | 31.9 |
| 113 | MainCh | 82.4 |     | 85.3  |     | 77.7  |     | 92.1  |     | 85.1  |      |      |     |      |

|     |        |      |     |      |     |      |     |       |     |      |     |      |    |      |
|-----|--------|------|-----|------|-----|------|-----|-------|-----|------|-----|------|----|------|
| 114 | P!     | 70   | 0.6 | 68.7 | 1.1 | 81.5 | 1.1 |       |     |      |     | 3.09 | 17 | 14.4 |
| 114 | V      | 69.4 | 3.1 | 67.6 | 2.1 | 83.1 | 0.5 |       |     |      |     |      | 8  | 6.8  |
| 114 | MainCh | 87.3 |     | 91   |     | 92.7 |     |       |     |      |     |      |    |      |
| 115 | F!     | 77   | 1.9 |      |     | 83   | 0.7 | 78.2  | 4.5 |      |     | 3.09 | 10 | 8.8  |
| 115 | MainCh | 91.3 |     |      |     | 93.4 |     | 92.3  |     |      |     |      |    |      |
| 117 | D!     | 82.8 | 2.9 | 82.3 | 1.9 | 85.2 | 1.4 |       |     | 87.1 | 1.3 |      | 3  | 3.9  |
| 117 | MainCh | 92.7 |     | 93.4 |     | 91.6 |     |       |     | 95.2 |     |      |    |      |
| 120 | L!     | 78.7 | 1.8 | 83.2 | 1.3 | 82.5 | 1.5 | 79.5  | 0.6 | 81   | 0.8 | 1.3  | 3  | 8.6  |
| 120 | S      | 76.9 | 0.4 | 81.9 | 1   | 79.1 | 4   | 76.3  | 2.9 | 80.2 | 1.3 |      | 2  | 5.7  |
| 120 | N      | 76.5 | 1   | 80.9 | 0.9 | 81   | 0.9 | 79.7  | 0.2 | 77.7 | 1   |      | 2  | 5.7  |
| 120 | D      | 75.5 | 5.2 | 80   | 1.7 | 80.1 | 1   | 78.9  | 2.4 | 76.7 | 1   |      | 3  | 8.6  |
| 120 | MainCh | 81.5 |     | 79.3 |     | 80.6 |     | 82.4  |     | 90.1 |     |      |    |      |
| 121 | P!     | 72   | 1   | 81   | 2.7 | 78.4 | 0.5 | 67.8* | 5.1 | 71.2 | 2.7 | 1.3  | 23 | 79.3 |
| 121 | G      | 71   | 5.6 | 67.8 | 1.1 | 77.1 | 0.1 | 70.6  | 2.8 | 80.7 | 9.5 |      | 0  | 0    |
| 121 | MainCh | 82.6 |     | 88.9 |     | 83.1 |     | 86.4  |     | 87.5 |     |      |    |      |

Res# stands for residue number; ResType for residues type; Cryst for crystallography, mon for monomer, RSCC for real-space correlation coefficient;  $\Delta$ Con for contrast difference within other RSCC; MS for mass spectrometry; ! for resolved residue. Residues in bold are the side chain with hydrogen bond with neighbour atom(s). Residues with \* had their side chain atoms omitted due to absence of electron density. Residues in bold are the side chain with hydrogen bond with neighbour atom(s).

Supplementary Table 14: Residues of MjTX-I having ambiguity assignment from both crystallographic and mass spectrometry data but being resolved by phylogenetic analysis

| Res# | ResType | Cryst mon ABCD |              | Cryst mon A |              | Cryst mon B |              | Cryst mon C |              | Cryst mon D |              | MS<br>PrimScore | ConSurf |      |
|------|---------|----------------|--------------|-------------|--------------|-------------|--------------|-------------|--------------|-------------|--------------|-----------------|---------|------|
|      |         | RSCC           | $\Delta$ Con | RSCC        | $\Delta$ Con | RSCC        | $\Delta$ Con | RSCC        | $\Delta$ Con | RSCC        | $\Delta$ Con |                 | n       | %    |
| 16   | N!      |                |              |             |              | 91.4        | 1.2          |             |              |             |              | 2.45            | 72      | 25.6 |
| 16   | D       |                |              |             |              | 88.1        | 0.2          |             |              |             |              | 2.6             | 16      | 5.7  |
| 16   | MainCh  |                |              |             |              | 96          |              |             |              |             |              |                 |         |      |
| 52   | G       | 77.8           | 1.3          | 82.4        | 0.3          | 77.2        | 0.7          | 72.9        | 2.9          | 74.3        | 1.3          |                 | 66      | 22.1 |
| 52   | S       | 76.5           | 0.8          | 84.5        | 2.1          | 76.4        | 1.2          | 76.9        | 1.2          | 71.5        | 1.1          |                 | 35      | 11.7 |

|     |        |      |     |       |     |      |     |      |     |       |     |      |    |      |
|-----|--------|------|-----|-------|-----|------|-----|------|-----|-------|-----|------|----|------|
| 52  | K!     | 73.7 | 0.8 | 86.5  | 2   | 76.5 | 0.1 | 68.8 | 0.8 | 73*   | 0.3 |      | 28 | 9.4  |
| 52  | I      | 72.8 | 0.9 | 75.1  | 4.3 | 78.2 | 1   | 79.8 | 2.9 | 70.2  | 2.3 | 0.86 | 2  | 0.7  |
| 52  | MainCh | 87.9 |     | 94.5  |     | 89.7 |     | 83.8 |     | 89    |     |      |    |      |
| 61  | A      | 70   | 1.4 | 87.6  | 7.3 |      |     | n/a  | n/a | 74.5  | 5.2 |      | 4  | 1.3  |
| 61  | G      | 68.6 | 0.2 | 67.9  | 2.8 |      |     | n/a  | n/a | 77.1  | 2.6 |      | 0  | 0.0  |
| 61  | S      | 68.4 | 2   | 80.3  | 0.7 |      |     | 67.7 | 0.3 | 59.1  | 0.6 |      | 13 | 4.3  |
| 61  | K!     | 66.4 | 2.6 | 79,6* | 0.6 |      |     | n/a* | n/a | 67,3* | 3.7 |      | 8  | 2.7  |
| 61  | MainCh | 91.5 |     | 89.8  |     |      |     | 83.9 |     | 92.1  |     |      |    |      |
| 70  | N!     | 84.4 | 5.8 | 86.7  | 0.6 | 92.5 | 0.8 | 77.4 | 0.2 | 74    | 0.4 |      | 96 | 32.5 |
| 70  | L      | 78.6 | 0.3 | 85.1  | 4.1 | 89.7 | 0.8 | 74.2 | 3.2 | 62.2  | 0.1 |      | 0  | 0.0  |
| 70  | D      | 78.3 | 1.8 | 86.1  | 1   | 91.7 | 1.9 | 71   | 1.7 | 60.9  | 0.1 | 2.42 | 44 | 14.9 |
| 70  | MainCh | 92.8 |     | 95.9  |     | 96.2 |     | 88   |     | 85.5  |     |      |    |      |
| 77  | Q      | 61.2 | 2.3 | 79.6  | 1.1 | 65.7 | 0.1 | 59   | 1.2 | 63.5  | 2.7 | 2.14 | 3  | 1.0  |
| 77  | E!     | 58.9 | 1.1 | 80.4  | 0.8 | 64.8 | 0.9 | 60.1 | 1.1 | 60,8* | 0.5 | 2.51 | 24 | 8.0  |
| 77  | MainCh | 81.7 |     | 93.3  |     | 73   |     | 56   |     | 84.7  |     |      |    |      |
| 78  | D      | 75.2 | 1.1 | 91.4  | 0   | 74   | 1.2 | 65.5 | 1   | 83.1  | 0.2 | 1.27 | 20 | 6.7  |
| 78  | N!     | 74.1 | 0   | 91.4  | 2.3 | 72.8 | 0.5 | 64.3 | 0   | 82.9  | 1.1 | 1.74 | 90 | 30.2 |
| 78  | L      | 74.1 | 2.8 | 89.1  | 5.8 | 75.1 | 0.4 | 63.2 | 1.6 | 81.8  | 2.1 | 1.29 | 4  | 1.3  |
| 78  | E      | 71.3 | 0.2 | 81.1  | 1.2 | 78.2 | 1.7 | 67.9 | 1.8 | 76.2  | 1.2 | 2.51 | 26 | 8.7  |
| 78  | Q      | 66.6 | 0.3 | 67    | 0.4 | 76.5 | 1.4 | 69.7 | 1.1 | 75    | 1.3 | 2.14 | 29 | 9.7  |
| 78  | MainCh | 79   |     | 85.3  |     | 73.5 |     | 72   |     | 79.8  |     |      |    |      |
| 79  | N!     |      |     | 84.3  | 0.7 |      |     | 83.2 | 2.3 | 82.4  | 2.4 | 1.77 | 65 | 21.8 |
| 79  | D      |      |     | 83.6  | 2.8 |      |     | 80.9 | 2.1 | 78.7  | 0.4 | 2.51 | 81 | 27.2 |
| 79  | L      |      |     | 80.8  | 2.9 |      |     | 78.8 | 1.2 | 80    | 1.3 |      | 1  | 0.3  |
| 79  | MainCh |      |     | 78.6  |     |      |     | 79.6 |     | 79.8  |     |      |    |      |
| 109 | D      | 67.0 | 4.7 | 80.5  | 1.2 | 71.0 | 1.3 | n/a  | n/a | 77.2  | 0.2 | 2.85 | 11 | 7.1  |
| 109 | L      | 58.9 | 3.1 | 82.6  | 0.9 | 68.6 | 3.7 | n/a  | n/a | 77.0  | 0.7 |      | 3  | 1.9  |
| 109 | N!     | 50.2 | 0.4 | 81.7  | 1.2 | 73.5 | 1.2 | n/a* | n/a | 76.3  | 4.2 | 3.09 | 45 | 29.2 |
| 109 | MainCh | 71.1 |     | 66.4  |     | 74.2 |     | 62.7 |     | 84.4  |     |      |    |      |

Res# stands for residue number; ResType for residues type; Cryst for crystallography, mon for monomer, RSCC for real-space correlation coefficient;  $\Delta$ Con for contrast difference within other RSCC; MS for mass spectrometry; PrimScore for Primary Score ! for resolved residue. Residues with \* had their side chain atoms omitted due to absence of electron density.

Supplementary Table 15: Residues of crotoxin resolved by crystallography and MS and/or phylogenetic analysis

| Crystallography monomer A |         |      |               |       | Crystallography monomer B |         |      |               |       | MS           | ConSurf |            |
|---------------------------|---------|------|---------------|-------|---------------------------|---------|------|---------------|-------|--------------|---------|------------|
| Res#                      | ResType | RSCC | $\Delta$ Cont | RSCC* | Res#                      | ResType | RSCC | $\Delta$ Cont | RSCC* | PrimaryScore | n       | %          |
|                           |         |      |               |       | 1                         | H       | 97.1 | 4.5           | 97    | 3.52         | 0       | 0.0        |
| 2                         | L       | 93.6 | 4             | 96.9  | 2                         | L       | 91.4 | 5.9           | 95.2  | 3.52         | 123     | 89.8       |
| 5                         | F       | 96.1 | 4.2           | 96.5  | 5                         | F       | 95.3 | 6             | 96.7  | 3.52         | 127     | 65.5       |
| 8                         | M       | 97.4 | 5.8           | 95    | 8                         | M       | 97.3 | 4.7           | 96.4  | 3.52         | 167     | 82.7       |
| 9                         | I       | 95.5 | 6.3           | 95.2  | 9                         | I       | 96.1 | 3.5           | 96    | 3.52         | 175     | 85.4       |
| 10                        | K       | 91   | 9             | 96.8  | 10                        | K       | 92   | 6.8           | 95.3  | 3.52         | 83      | 40.3       |
|                           |         |      |               |       | 11                        | F       | 96.1 | 6.1           | 95.1  | 3.52         | 4       | 1.9        |
| 13                        | T       | 94.8 | 5.8           | 94.1  | 13                        | T       | 96.8 | 3.6           | 96    | 3.52         | 144     | 68.6       |
| 14                        | R       | 88.5 | 6.4           | 91    | 14                        | R       | 84.9 | 3.7           | 94.9  | 3.52         | 12      | 5.6        |
| 15                        | K       | 84.9 | 8.6           | 93.6  | 15                        | K       | 90.2 | 4             | 96.3  | 6.32         | 89      | 40.1       |
| 16                        | N       | 88.1 | 3.9           | 94.4  |                           |         |      |               |       | 6.32         | 59      | 26.3       |
| 17                        | A       | 92.5 | 11.9          | 92    | 17                        | A       | 92.1 | 21            | 93.3  | 6.32         | 98      | 43.0       |
| 19                        | P       | 96.3 | 16.1          | 97    | 19                        | P       | 96.1 | 16            | 97    | 6.32         | 10      | 4.2        |
| 20                        | F       | 96   | 4.5           | 96.9  | 20                        | F       | 95   | 4.3           | 96.8  | 6.32         | 6       | 2.3        |
| 21                        | Y       | 95.8 | 6             | 96.4  | 21                        | Y       | 96.4 | 6.6           | 95.2  | 6.32         | 236     | 81.1       |
| 22                        | A       | 83.8 | 11.3          | 92.1  | 22                        | A       | 88.4 | 14            | 92.9  | 6.32         | 43      | 14.7       |
| 23                        | F       | 94   | 5.3           | 95.5  | 23                        | F       | 95.9 | 2.7           | 84.3  | 6.32         | 37      | 12.4       |
| 24                        | Y       | 97.1 | 7.8           | 96    | 24                        | Y       | 95.2 | 6             | 95.4  | 6.32         | 296     | 99.3       |
| 25                        | G       | 93.2 | 17.4          | 95.9  | 25                        | G       | 90.5 | 19            | 95.3  | 6.32         | 297     | 99.7       |
| 26                        | C       | 95.7 | 16.8          | 94.2  | 26                        | C       | 94.5 | 13            | 94.4  | 6.32         | 294     | 98.7       |
| 27                        | Y       | 94.1 | 5.3           | 95    | 27                        | Y       | 95.6 | 7.7           | 95.9  | 6.32         | 225     | 75.5       |
| 28                        | C       | 97.2 | 18.1          | 94.9  | 28                        | C       | 95.6 | 10            | 86.2  | 6.32         | 297     | 99.7       |
| 29                        | G       | 61.8 | 4.6           | 89.9  | 29                        | G       | 37.9 | 4.7           | 79.1  | 6.32         | 289     | 97.0       |
| 30                        | W       | 95   | 8.4           | 96.4  | 30                        | W       | 81   | 3.9           | 83.4  | 6.32         | 43      | 14.4       |
| 31                        | G       | 90.5 | 31.7          | 95.1  | 31                        | G       | 64.7 | 30            | 83.1  | 6.32         | 261     | 87.6       |
| 32                        | G       | 87.6 | 13.3          | 95.3  | 32                        | G       | 81.3 | 17            | 90.4  | 6.32         | 281     | 94.3       |
| 33                        | Q       | 91.4 | 6.5           | 94.5  | 33                        | A       | 78   | 4.8           | 92.5  | 6.32 / -     | 41 / 8  | 13.8 / 2.7 |

|    |   |      |      |      |    |   |      |     |      |          |        |            |
|----|---|------|------|------|----|---|------|-----|------|----------|--------|------------|
| 34 | G | 88.3 | 16.7 | 94.7 | 34 | G | 91   | 17  | 96.6 | 6.32     | 275    | 92.3       |
| 36 | P | 89   | 14.8 | 89.6 | 36 | P | 94.5 | 10  | 95   | 4.95     | 290    | 97.3       |
| 37 | A | 89.6 | 13.4 | 91.7 | 37 | K | 90.9 | 4.5 | 93.2 | - / 4.95 | 3 / 72 | 1.0 / 24,2 |
| 39 | A | 91.8 | 21.1 | 95.7 | 39 | A | 94.4 | 25  | 95.6 | 3.27     | 97     | 32.6       |
|    |   |      |      |      | 41 | D | 96.9 | 3.2 | 95.2 | 3.27     | 298    | 99.7       |
|    |   |      |      |      | 42 | R | 87   | 8.6 | 94.2 | 3.55     | 163    | 54.3       |
| 43 | C | 95.6 | 7.6  | 95.7 | 43 | C | 95   | 8.5 | 94   | 3.55     | 297    | 99.7       |
| 44 | C | 95.7 | 16.8 | 96.5 | 44 | C | 95.2 | 8   | 94.4 | 3.55     | 298    | 100.0      |
| 45 | F | 94.3 | 4.2  | 95.4 | 45 | F | 95.2 | 3.4 | 93   | 3.55     | 60     | 20.1       |
| 46 | V | 92.6 | 6.2  | 95   | 46 | V | 92.4 | 4.6 | 96.5 | 3.55     | 80     | 26.8       |
| 47 | H | 94   | 5    | 93.8 | 47 | H | 96.7 | 3.9 | 95.5 | 3.55     | 294    | 98.3       |
| 48 | D | 87.6 | 3.8  | 95.5 |    |   |      |     |      | 3.55     | 261    | 87.3       |
| 49 | C | 95.5 | 14.2 | 94.8 | 49 | C | 95.7 | 11  | 95   | 3.55     | 169    | 56.5       |
| 50 | C | 94.3 | 10.7 | 94.1 | 50 | C | 95.1 | 7.5 | 96.2 | 3.55     | 298    | 99.7       |
| 51 | Y | 93.5 | 6    | 93.5 | 51 | Y | 96.7 | 6.7 | 95.5 | 3.55     | 281    | 94.0       |
| 52 | G | 82.3 | 34.1 | 93.1 | 52 | G | 82.7 | 23  | 92   | 3.55     | 79     | 26.4       |
| 53 | K | 90.6 | 5.7  | 91.5 | 53 | K | 91.1 | 6.6 | 92.7 | 3.55     | 81     | 27.1       |
| 54 | L | 92.2 | 4.7  | 92.6 | 54 | L | 92.6 | 5.6 | 95.1 | 1.39     | 109    | 36.5       |
| 56 | K | 91   | 6.7  | 90.4 | 56 | K | 87.6 | 9.3 | 93   | 1.39     | 14     | 4.8        |
| 57 | C | 92.7 | 13.6 | 90   | 57 | C | 96.8 | 16  | 97.2 | 3.94     | 294    | 98.7       |
|    |   |      |      |      | 60 | N | 89.9 | 4.9 | 95   |          | 2      | 0.7        |
| 61 | W | 93.1 | 7.7  | 87.1 | 61 | W | 95.7 | 9.7 | 95   | 3.94     | 15     | 5.0        |
| 62 | N | 72.4 | 3.8  | 84.4 | 62 | N | 95.3 | 3.9 | 96.7 |          | 26     | 8.7        |
| 64 | Y | 94.9 | 4.4  | 95.4 | 64 | Y | 95.2 | 5.9 | 94.1 | 3.94     | 277    | 92.3       |
| 65 | R | 75.9 | 4.4  | 86.1 | 65 | R | 90   | 4.7 | 95.1 | 2.77     | 23     | 7.7        |
| 66 | Y | 93.1 | 6.7  | 83.5 | 66 | Y | 96.5 | 3.6 | 94.5 | 3.94     | 142    | 47.5       |
| 67 | S | 86.2 | 6.4  | 92.2 | 67 | S | 89.8 | 3.6 | 95   | 3.94     | 104    | 34.8       |
| 68 | L | 93.2 | 5.9  | 93.5 | 68 | L | 93.4 | 3.9 | 95   | 3.94     | 8      | 2.7        |
|    |   |      |      |      | 69 | A | 77.5 | 7   | 88.5 |          | 19     | 6.3        |
|    |   |      |      |      | 70 | S | 95.8 | 13  | 94.8 | 3.00     | 25     | 8.3        |
| 71 | G | 87   | 35.1 | 91.7 | 71 | G | 86.4 | 23  | 94.1 | 3.00     | 113    | 37.7       |
| 72 | Y | 93.6 | 7.6  | 90.6 | 72 | Y | 93.5 | 3.7 | 93.4 | 3.00     | 3      | 1.0        |
|    |   |      |      |      | 73 | I | 95.5 | 5.8 | 95.7 | 3.00     | 143    | 47.7       |
| 74 | T | 84.3 | 3.9  | 88.5 |    |   |      |     |      | 3.00     | 113    | 37.7       |
| 75 | C | 92   | 10.3 | 89.3 | 75 | C | 95.8 | 18  | 95.3 | 3.00     | 298    | 99.7       |
| 76 | G | 69   | None | 87.8 | 76 | G | 88.5 | 32  | 94.5 | 3.00     | 53     | 17.9       |

|     |   |      |      |      |     |   |      |     |      |             |         |             |
|-----|---|------|------|------|-----|---|------|-----|------|-------------|---------|-------------|
| 77  | G | 73.5 | 13.4 | 87.8 | 77  | K | 82.5 | 7   | 91.9 | - / 3.00    | 40 / 42 | 13.7 / 14.3 |
| 78  | G | 65.8 | 8.7  | 75.6 | 78  | G | 83   | 14  | 94.3 | 3.97        | 52      | 17.9        |
|     |   |      |      |      | 79  | T | 92.5 | 4.3 | 93.8 | 3.97        | 52      | 17.9        |
| 80  | W | 92.4 | 9.7  | 93.2 | 80  | W | 96.5 | 12  | 95.1 | 3.97        | 26      | 8.9         |
| 81  | C | 91.4 | 8.1  | 91.2 | 81  | C | 93.6 | 8.4 | 94.5 | 3.97        | 280     | 96.2        |
| 82  | E | 85.8 | 7.4  | 94.2 |     |   |      |     |      | 3.97        | 90      | 31.0        |
| 83  | E | 88.3 | 3.1  | 95.2 |     |   |      |     |      | 3.97        | 11      | 3.8         |
| 84  | Q | 89   | 5.2  | 96.7 | 84  | Q | 95.4 | 3.9 | 96.6 | 3.97        | 59      | 20.3        |
| 86  | C | 93.5 | 3.2  | 93.8 | 86  | C | 96.6 | 15  | 94.2 | 3.97        | 289     | 100.0       |
|     |   |      |      |      | 87  | E | 93   | 4.8 | 95.6 | 3.97        | 126     | 43.9        |
| 88  | C | 96.3 | 8.5  | 95.6 | 88  | C | 96.6 | 14  | 96.7 | 3.97        | 287     | 99.3        |
| 90  | R | 95   | 6.5  | 95.7 | 90  | R | 94.3 | 3.6 | 96   | 3.97        | 124     | 43.1        |
|     |   |      |      |      | 91  | V | 95.2 | 4   | 97   | 3.80        | 24      | 8.4         |
| 92  | A | 95.8 | 17.9 | 97.7 | 92  | A | 93.8 | 11  | 96.9 | 3.80        | 199     | 69.3        |
| 93  | A | 93.3 | 14.1 | 95.8 | 93  | A | 95.1 | 20  | 97   | 3.80        | 236     | 82.2        |
| 94  | E | 93   | 6.4  | 95.8 | 94  | E | 90.2 | 2.6 | 93.6 | 3.80        | 52      | 18.1        |
|     |   |      |      |      | 95  | C | 94   | 14  | 95.9 | 3.80        | 284     | 99.0        |
| 96  | L | 95.6 | 3    | 94.3 | 96  | L | 96.4 | 3.2 | 97.8 | 3.80        | 83      | 28.9        |
| 97  | R | 92.5 | 3.8  | 95.5 | 97  | R | 92.5 | 3.8 | 95.9 | 3.80        | 53      | 18.7        |
| 98  | A | 86.3 | 5.3  | 91.3 | 98  | R | 95.4 | 5.5 | 94.6 | 3.64 / 2.99 | 24 / 70 | 9.5 / 27,8  |
| 99  | S | 94   | 11   | 95.4 | 99  | S | 96.2 | 11  | 96.4 | 3.74        | 35      | 15.0        |
| 101 | S | 82.8 | 8.7  | 90.6 | 101 | S | 81.5 | 4.8 |      | 3.74        | 7       | 6.0         |
| 102 | T | 94.1 | 3.9  | 93.9 | 102 | T | 94.4 | 5   | 95.1 | 3.74        | 89      | 41.2        |
| 103 | Y | 95.3 | 5.7  | 90.1 | 103 | Y | 94.7 | 4.6 | 95.6 | 3.74        | 172     | 83.5        |
| 104 | T | 89.1 | 6    | 92.9 |     |   |      |     |      | 3.64        | 3       | 1.5         |
| 105 | N | 91   | 4.2  | 90.8 | 105 | Y | 93.2 | 1.9 | 96.7 | 3.74 / 2.99 | 22 / 0  | 11.1 / 0,0  |
| 106 | G | 72.5 | 7    | 90.4 | 106 | G | 92.6 | 25  | 94.2 | 3.74        | 4       | 2.1         |
| 107 | Y | 91.2 | 3.1  | 94   | 107 | Y | 94.9 | 3   | 96.1 | 3.74        | 119     | 61.7        |
| 108 | M | 95.4 | 6    | 95.6 | 108 | M | 95   | 0.8 | 92.6 | 3.74        | 9       | 4.8         |
| 109 | F | 96.4 | 3.2  | 94.3 | 109 | F | 96.2 | 3.5 | 90.6 | 3.74        | 46      | 24.7        |
| 110 | Y | 96.4 | 4.8  | 94.8 | 110 | Y | 95   | 3   | 96.1 | 3.74        | 92      | 51.1        |
| 111 | P | 83   | 12.4 | 90   | 111 | P | 91.5 | 16  | 92.2 | 3.74        | 104     | 58.4        |
|     |   |      |      |      | 112 | D | 88.1 | 6.4 | 93.7 | 3.74        | 32      | 18.1        |
| 113 | S | 77.9 | 8    | 83.2 |     |   |      |     |      | 3.74        | 23      | 12.8        |
| 114 | R | 84.4 | 3.6  | 88.6 | 114 | R | 83   | 1.4 | 93   | 3.74        | 33      | 18.5        |
| 115 | C | 96   | 18.2 | 83.3 | 115 | C | 89.1 | 7   | 88.6 | 1.25        | 179     | 100.0       |



|    |        |      |     |      |     |      |    |        |      |     |      |     |      |
|----|--------|------|-----|------|-----|------|----|--------|------|-----|------|-----|------|
| 11 | H      | 91.7 | 3.1 |      | 19  | 9.2  |    |        |      |     |      |     |      |
| 11 | MainCh | 94.7 |     |      |     |      |    |        |      |     |      |     |      |
| 12 | E!     | 93.9 | 1.8 | 3.52 | 12  | 5.8  | 12 | E!     | 94.7 | 1   | 3.52 | 12  | 5.8  |
| 12 | Q      | 92.2 | 5.4 |      | 0   | 0.0  | 12 | Q      | 93.7 | 5.4 |      | 0   | 0.0  |
| 12 | MainCh | 92.6 |     |      |     |      | 12 | MainCh | 96.3 |     |      |     |      |
|    |        |      |     |      |     |      | 16 | N!     | 93.8 | 1.7 | 6.32 | 59  | 26.3 |
|    |        |      |     |      |     |      | 16 | L      | 92.1 | 2.1 |      | 3   | 1.3  |
|    |        |      |     |      |     |      | 16 | S      | 90.0 | 2.8 |      | 68  | 30.4 |
|    |        |      |     |      |     |      | 16 | D      | 87.2 | 6.5 |      | 10  | 4.5  |
|    |        |      |     |      |     |      | 16 | MainCh | 95.8 |     |      |     |      |
| 18 | V!     | 90.9 | 0.4 | 6.32 | 23  | 13.6 | 18 | !      | 92.2 | 2.4 | 5.47 | 27  | 16.0 |
| 18 | T      | 90.5 | 3.9 |      | 6   | 3.6  | 18 | V      | 89.8 | 2.2 | 6.32 | 23  | 13.6 |
| 18 | MainCh | 95.2 |     |      |     |      | 18 | T      | 87.6 | 2.3 |      | 6   | 3.6  |
|    |        |      |     |      |     |      | 18 | MainCh | 95.9 |     |      |     |      |
| 35 | A      | 77.9 | 1.7 |      | 5   | 1.7  | 35 | R!     | 86.2 | 1.8 | 6.32 | 21  | 7.0  |
| 35 | R!*    | 67.3 | 2.1 | 6.32 | 21  | 7.0  | 35 | K      | 84.4 | 4.9 |      | 14  | 4.7  |
| 35 | MainCh | 95.7 |     |      |     |      |    |        | 95.7 |     |      |     |      |
| 38 | D!     | 95.2 | 1.2 | 3.27 | 297 | 99.7 | 38 | D!     | 97   | 2.2 | 3.27 | 297 | 99.7 |
| 38 | N      | 94   | 8.3 |      | 0   | 0.0  | 38 | N      | 94.8 | 6.4 |      | 0   | 0.0  |
| 38 | MainCh | 94.7 |     |      |     |      | 38 | MainCh | 95   |     |      |     |      |
| 40 | T!     | 94.8 | 1.5 | 3.27 | 126 | 42.3 | 40 | T!     | 95.7 | 1.8 | 3.27 | 126 | 42.3 |
| 40 | V      | 93.3 | 8   |      | 29  | 9.7  | 40 | V      | 93.9 | 4.9 |      | 29  | 9.7  |
| 40 | MainCh | 96.3 |     |      |     |      | 40 | MainCh | 96.2 |     |      |     |      |
| 42 | R!     | 84   | 0.3 | 3.55 | 163 | 54.3 |    |        |      |     |      |     |      |
| 42 | A      | 92   |     |      | 4   | 1.3  |    |        |      |     |      |     |      |
| 42 | MainCh | 95.1 |     |      |     |      |    |        |      |     |      |     |      |
|    |        |      |     |      |     |      | 48 | D!     | 89.5 | 1   | 3.55 | 261 | 87.3 |
|    |        |      |     |      |     |      | 48 | S      | 88.5 | 3.5 |      | 0   | 0.0  |





|     |        |      |      |    |      |     |        |      |      |    |      |
|-----|--------|------|------|----|------|-----|--------|------|------|----|------|
| 117 | G!     |      | 1.25 | 72 | 50.0 | 117 | G!     | 57.4 | 1.25 | 72 | 50.0 |
| 117 | MainCh | 60.3 |      |    |      | 117 | MainCh | 74.7 |      |    |      |

Res# stands for residue number; ResType for residues type; RSCC for real-space correlation coefficient;  $\Delta$ Co for contrast difference within other RSCC; MainCh for main chain atoms; MS for mass spectrometry; H-bond for hydrogen bond; ! for resolved residue.

Supplementary Table 17: Residues of crotoxin having ambiguity assignment from both crystallographic and mass spectrometry data but being resolved by phylogenetic analysis

| Crystallography monomer A |         |      |               | MS           |    | ConSurf |      | Crystallography monomer B |      |               |              | MS  |      | ConSurf |  |
|---------------------------|---------|------|---------------|--------------|----|---------|------|---------------------------|------|---------------|--------------|-----|------|---------|--|
| Res#                      | ResType | RSCC | $\Delta$ Cont | PrimaryScore | n  | %       | Res# | ResType                   | RSCC | $\Delta$ Cont | PrimaryScore | n   | %    |         |  |
| 60                        | N!      | 83   | 2.4           |              | 2  | 0.7     |      |                           |      |               |              |     |      |         |  |
| 60                        | L       | 81.1 | 0.5           |              | 6  | 2.0     |      |                           |      |               |              |     |      |         |  |
| 60                        | MainCh  | 88   |               |              |    |         |      |                           |      |               |              |     |      |         |  |
| 69                        | A!      | 68   | 0.1           |              | 19 | 6.3     |      |                           |      |               |              |     |      |         |  |
| 69                        | N       | 68   | 0.9           |              | 9  | 3.0     |      |                           |      |               |              |     |      |         |  |
| 69                        | D       | 67   | 2.1           |              | 7  | 2.3     |      |                           |      |               |              |     |      |         |  |
| 69                        | MainCh  | 75   |               |              |    |         |      |                           |      |               |              |     |      |         |  |
|                           |         |      |               |              |    |         | 74   | T!                        | 94.1 | 0.8           | 3.00         | 113 | 37.7 |         |  |
|                           |         |      |               |              |    |         | 74   | V                         | 93.3 | 7.6           |              | 46  | 15.3 |         |  |
|                           |         |      |               |              |    |         | 74   | MainCh                    | 95.6 |               |              |     |      |         |  |
| 82                        | E!      | 82   | 2             | 3.97         | 90 | 31.0    | 82   | E!                        | 93.3 | 0.6           | 3.97         | 90  | 31.0 |         |  |
| 82                        | Q       | 80   | 1.3           | 3.80         | 63 | 21.7    | 82   | Q                         | 92.6 | 4.1           | 3.80         | 63  | 21.7 |         |  |
| 82                        | MainCh  | 95   |               |              |    |         |      |                           |      |               |              |     |      |         |  |
| 100                       | D       | 95   | 1             | 3.74         | 0  | 0.0     | 100  | D                         | 95.6 | 1.2           | 3.74         | 0   | 0.0  |         |  |
| 100                       | L!      | 94   | 0.8           | 2.99         | 55 | 47.4    | 100  | L!                        | 94.4 | 0.3           | 2.99         | 55  | 47.4 |         |  |
| 100                       | N       | 93   | 5.5           | 3.64         | 0  | 0.0     | 100  | N                         | 94   | 8.8           | 3.64         | 0   | 0.0  |         |  |
| 100                       | MainCh  | 95   |               |              |    |         | 100  | MainCh                    | 95.7 |               |              |     |      |         |  |
| 120                       | E!      | 93   | 2.3           | 1.25         | 19 | 16.4    | 120  | E!                        | 93.4 | 1.4           | 1.25         | 19  | 16.4 |         |  |
| 120                       | Q       | 91   | 4.6           |              | 1  | 0.9     | 120  | Q                         | 92   | 4.8           |              | 1   | 0.9  |         |  |

|     |        |    |     |      |    |      |     |        |      |     |      |    |      |
|-----|--------|----|-----|------|----|------|-----|--------|------|-----|------|----|------|
| 120 | MainCh | 88 |     |      |    |      | 120 | MainCh | 95.3 |     |      |    |      |
| 121 | T!     | 73 | 1.4 | 1.25 | 30 | 26.8 | 121 | T!     | 89.6 | 2.9 | 0.38 | 30 | 26.8 |
| 121 | I      | 71 | 0.3 |      | 0  | 0.0  | 121 | V      | 86.7 | 7.1 |      | 0  | 0.0  |
| 121 | V      | 71 | 2.3 |      | 0  | 0.0  | 121 | MainCh | 90.7 | 5.1 |      |    |      |

Res# stands for residue number; ResType for residues type; RSCC for real-space correlation coefficient;  $\Delta$ Cont for contrast difference within other RSCC; MainCh for main chain atoms; MS for mass spectrometry; PrScore for PrimaryScore; H-bond for hydrogen bond; ! for resolved residue.
